# Supplementary material for: Discovery of an Unconventional Centromere in Budding Yeast Redefines Evolution of Point Centromeres
Source: PubMed Central journal article supplement (PMC4533239; doi:10.1016/j.cub.2015.06.023), 2015-08-03
Supplement: mmc2.pdf [file mmc2.pdf]

# Current Biology

## Discovery of an Unconventional Centromere in Budding Yeast Redefines Evolution of Point Centromeres

### Graphical Abstract

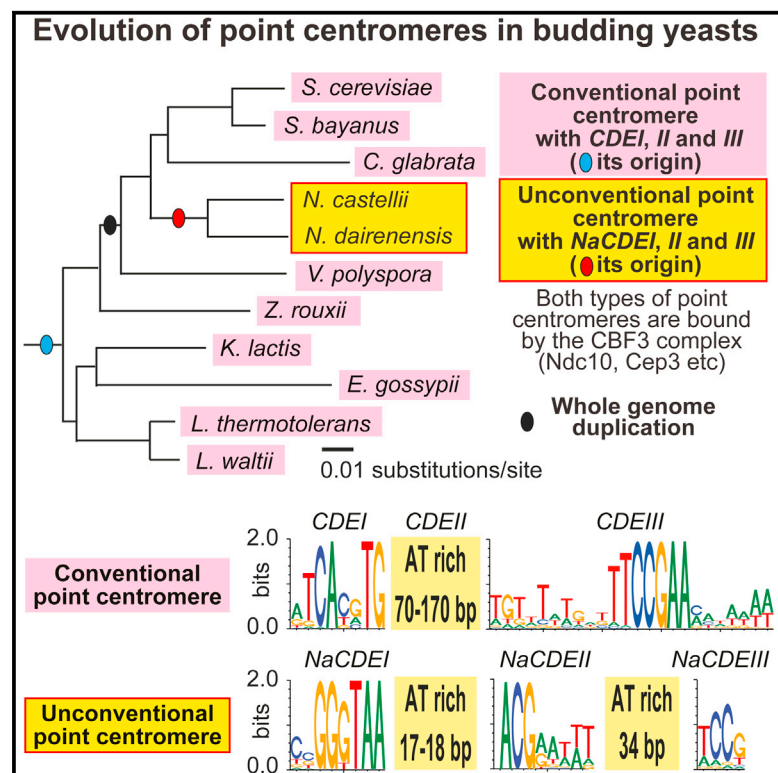

### Highlights

- A new type of point centromere has been identified in budding yeast *N. castellii*
- Its DNA sequence and evolutionary origin are different from other point centromeres
- *N. castellii* centromeres are bound by CBF3 that recognizes other point centromeres
- Contrary to the conventional view, point centromeres can change rapidly in evolution

### Authors

Norihiko Kobayashi, Yutaka Suzuki, Lori W. Schoenfeld, ..., Conrad Nieduszynski, Kenneth H. Wolfe, Tomoyuki U. Tanaka

### Correspondence

t.tanaka@dundee.ac.uk

### In Brief

All known point centromeres share common DNA sequences and a single evolutionary origin. Kobayashi et al. have identified a new type of point centromere in budding yeast *N. castellii*. Its DNA sequence and evolutionary origin are different from other point centromeres. Discovery of the new centromere redefines the evolution of point centromeres.

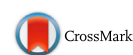

# Discovery of an Unconventional Centromere in Budding Yeast Redefines Evolution of Point Centromeres

Norihiko Kobayashi,<sup>1</sup> Yutaka Suzuki,<sup>2</sup> Lori W. Schoenfeld,<sup>3,4</sup> Carolin A. Müller,<sup>5</sup> Conrad Nieduszynski,<sup>5</sup> Kenneth H. Wolfe,<sup>6</sup> and Tomoyuki U. Tanaka<sup>1,\*</sup>

<sup>1</sup>Centre for Gene Regulation and Expression, College of Life Sciences, University of Dundee, Dundee DD1 5EH, UK

<sup>2</sup>Department of Computational Biology, School of Frontier Medicine, University of Tokyo, Chiba 277-8562, Japan

<sup>3</sup>Whitehead Institute for Biomedical Research, Cambridge, MA 02142, USA

<sup>4</sup>Howard Hughes Medical Institute and Department of Biology, Massachusetts Institute of Technology, Cambridge, MA 02139, USA

<sup>5</sup>Sir William Dunn School of Pathology, University of Oxford, Oxford OX1 3RE, UK

<sup>6</sup>UCD Conway Institute, School of Medicine and Medical Science, University College Dublin, Dublin 4, Ireland

\*Correspondence: [t.tanaka@dundee.ac.uk](mailto:t.tanaka@dundee.ac.uk)

<http://dx.doi.org/10.1016/j.cub.2015.06.023>

This is an open access article under the CC BY license (<http://creativecommons.org/licenses/by/4.0/>).

## SUMMARY

Centromeres are the chromosomal regions promoting kinetochore assembly for chromosome segregation. In many eukaryotes, the centromere consists of up to mega base pairs of DNA. On such “regional centromeres,” kinetochore assembly is mainly defined by epigenetic regulation [1]. By contrast, a clade of budding yeasts (*Saccharomycetaceae*) has a “point centromere” of 120–200 base pairs of DNA, on which kinetochore assembly is defined by the consensus DNA sequence [2, 3]. During evolution, budding yeasts acquired point centromeres, which replaced ancestral, regional centromeres [4]. All known point centromeres among different yeast species share common consensus DNA elements (CDEs) [5, 6], implying that they evolved only once and stayed essentially unchanged throughout evolution. Here, we identify a yeast centromere that challenges this view: that of the budding yeast *Naumovozya castellii* is the first unconventional point centromere with unique CDEs. The *N. castellii* centromere CDEs are essential for centromere function but have different DNA sequences from CDEs in other point centromeres. Gene order analyses around *N. castellii* centromeres indicate their unique, and separate, evolutionary origin. Nevertheless, they are still bound by the ortholog of the CBF3 complex, which recognizes CDEs in other point centromeres. The new type of point centromere originated prior to the divergence between *N. castellii* and its close relative *Naumovozya dairenensis* and disseminated to all *N. castellii* chromosomes through extensive genome rearrangement. Thus, contrary to the conventional view, point centromeres can undergo rapid evolutionary changes. These findings give new insights into the evolution of point centromeres.

## RESULTS AND DISCUSSION

All known point centromeres have a common DNA sequence, known as CDEI, II, and III (Figures 1A and 1B) [5, 6]. Among different budding yeast species, the order of orthologous genes is generally conserved around the centromeres (i.e., in synteny) [11]. These indicate that the point centromeres themselves are orthologous. However, there are peculiar exceptions to this view: *Naumovozya castellii* (*N. castellii*) (previously called *Saccharomyces castellii*) and its close relative *N. dairenensis* belong to the clade of budding yeasts expected to have point centromeres [3, 7], but no CDEI,II,III-like sequences are found at the loci expected from synteny (Figure 1A; see Figure S1D) [6, 12]. They may use a novel type of point centromere or have re-acquired regional centromeres during their evolution. Here, we aim to identify the centromere in *N. castellii*.

### Kinetochore Components Show Single-Peak Localization on Each Chromosome of *N. castellii* by Chromatin Immunoprecipitation

In *Saccharomyces cerevisiae* (*S. cerevisiae*) and other budding yeasts, their point centromeres are recognized by the CBF3 complex, which binds the CDEIII DNA consensus [5, 13]. The CBF3, consisting of Ndc10, Cep3, Ctf13, and Skp1 proteins, is exclusively found in budding yeasts with point centromeres. In *S. cerevisiae*, the CBF3 and other kinetochore components show a bi-lobed pattern on the metaphase spindle and segregate following movement of the spindle poles during anaphase [14] (Figure 1C, top). Despite an apparent lack of CDEI,II,III-containing centromeres, the *N. castellii* genome encodes orthologs of the CBF3 components [10, 15]. In *N. castellii*, Ndc10 and Cep3 proteins showed the kinetochore-like localization pattern, similar to *S. cerevisiae* (Figure 1C, bottom). The same localization pattern was found for Ndc80 (Figure 1C, bottom), an outer kinetochore component [5]. Thus, Ndc10, Cep3, and Ndc80 might indeed be *N. castellii* kinetochore components.

To identify *N. castellii* centromeres, we added epitope tags to Ndc10, Cep3, and Ndc80 at their original loci, carried out chromatin immunoprecipitation followed by high-throughput DNA sequencing (ChIP-seq), and analyzed in reference to the

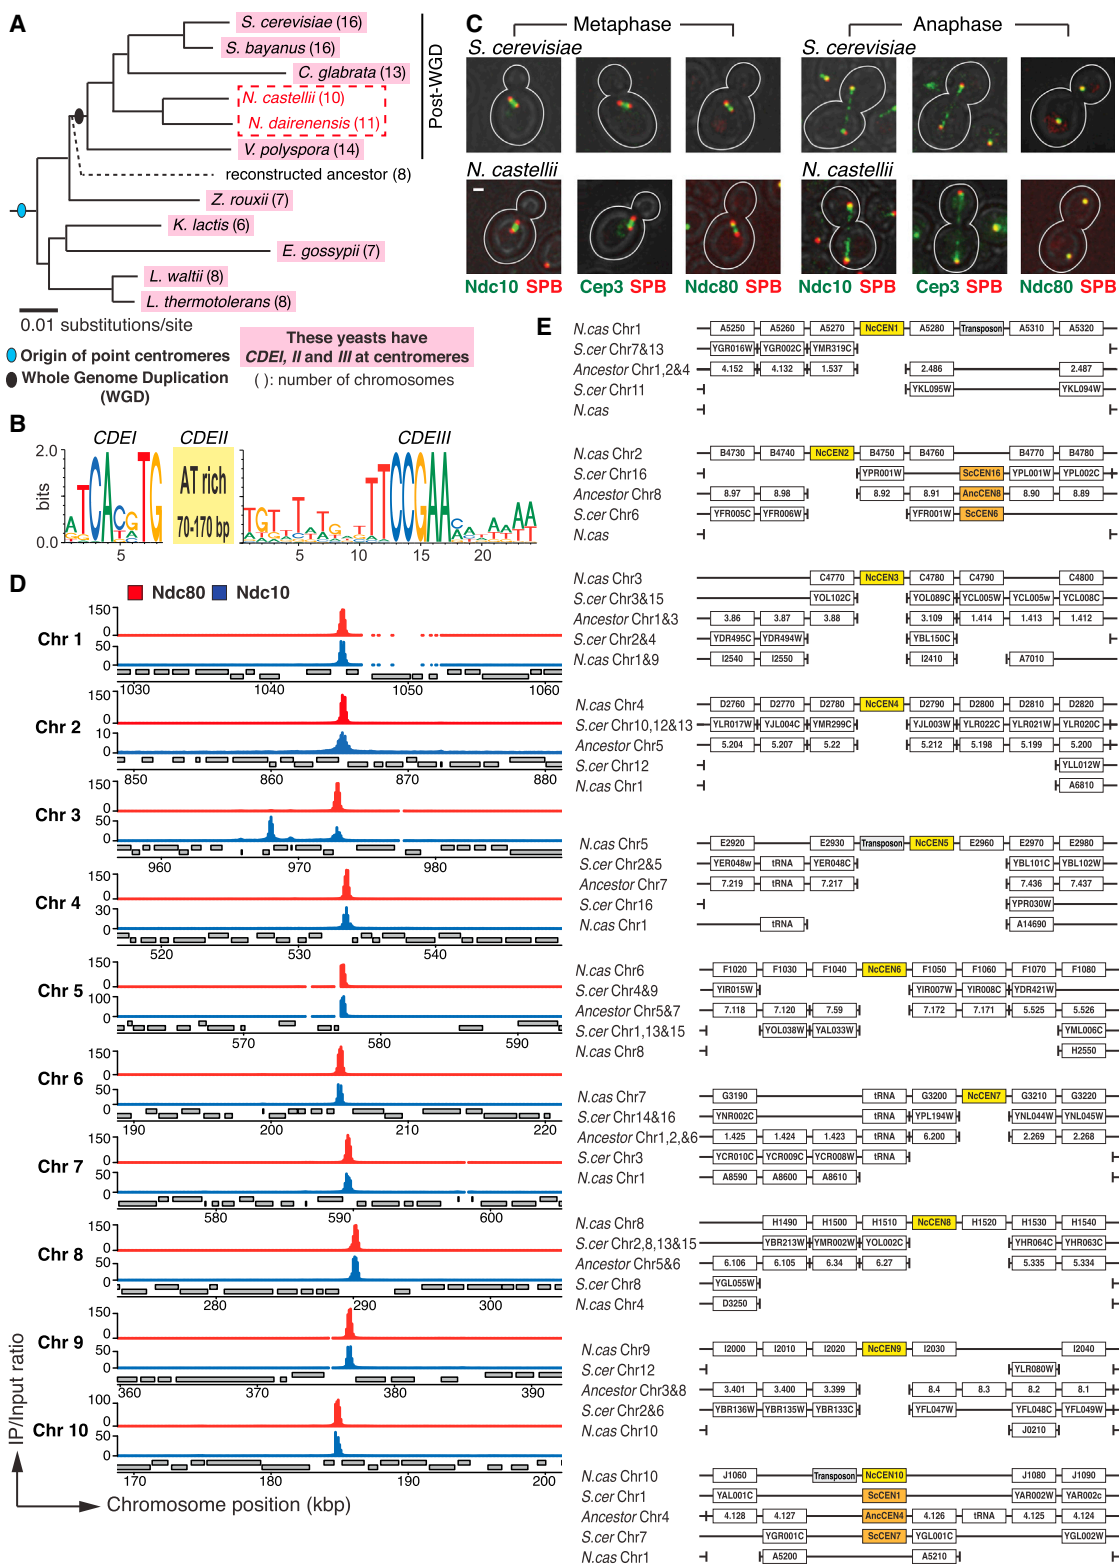

**Figure 1. Kinetochores Show Single-Peak Localization on Each Chromosome of *N. castellii***

(A) A clade of budding yeast species carries point centromeres with common consensus DNA sequences *CDEI*, *II*, and *III* (pink), except for *N. castellii* and *N. dairenensis* (red rectangle). Phylogenetic tree of budding yeast species is taken from [6, 7] with modification. Horizontal length in the tree is proportional to the change in genomic DNA sequences. The WGD (black oval) is estimated to have occurred approximately 100 million years ago [8], and the *N. castellii*/*N. dairenensis* divergence is about half this age.

(legend continued on next page)

annotated *N. castellii* genome sequence [15, 16]. We also carried out ChIP-seq for Cse4, a centromere-specific histone H3 variant. Crucially, Ndc80 ChIP-seq gave a distinct single peak at an intergenic region on each of ten chromosomes (Figures 1D and S1A). Cse4, Ndc10, and Cep3 gave peaks at the same ten intergenic regions as Ndc80 and gave one, two, and six additional peaks, respectively (Figures 1D and S1A–S1C). The chromosomal regions, where Ndc80 showed accumulation (together with Ndc10, Cep3, and Cse4), may serve as the centromeres in *N. castellii*. On this assumption, we tentatively named them *N. castellii* CEN1–10, or NcCEN1–10 for short, on chromosomes 1–10, respectively.

### Most *N. castellii* CENs Are Not at Conserved Syntenic Locations on Chromosomes, Compared with Locations of Other Point Centromeres

We compared the order of orthologous genes between *S. cerevisiae*, *N. castellii*, and an ancestor. This ancestor is evolutionarily positioned prior to the whole-genome duplication (WGD), which occurred during the evolution of budding yeasts [3] (Figure 1A), and its genome was constructed using bioinformatics [17]. Between *S. cerevisiae* and the ancestor, the gene order across the centromeres is conserved, including the centromeres themselves [11, 17] (Figure S1D). Thus, chromosomal positions of the centromeres did not change during evolution from the ancestor to *S. cerevisiae*. The gene order across the majority of the ancestral centromeric regions (excluding the centromeres themselves) is also conserved without rearrangement on *N. castellii* chromosomes (Figure S1D). However, *N. castellii* CEN locations are not syntenic to the CENs in the ancestor (Figures S1D and S1E). This suggests that centromeres “disappeared” from these ancestral centromeric loci during the *N. castellii* evolution. In fact, ancestral CEN4 and *N. castellii* CEN10 make the only centromere pair whose surrounding orthologs show complete synteny (Figures S1D and S1E). Conversely, *N. castellii* CEN1–9 are not located in regions of conserved gene order when compared to *S. cerevisiae* or the ancestor (Figure 1E). More specifically, the synteny along *N. castellii* chromosomes (relative to those of *S. cerevisiae* and the ancestor) is disrupted at the positions of NcCENs. It is therefore likely that *N. castellii* CEN1–9 have been positioned, at least partly, by genome rearrangement during evolution, rather than by de novo centromere formation between the existing genes.

### Candidate Centromere Regions Show Dynamic Behaviors Expected for Functional Centromeres in *N. castellii* Cells

We addressed whether *N. castellii* CENs show expected localizations of functional centromeres in cells. If *N. castellii* CENs promote kinetochore assembly, spindle microtubules should attach and apply forces on these chromosome regions. In *S. cerevisiae*, such forces cause separation of sister chromatids up to 10 kb from centromeres on the metaphase spindle [18–21]. To investigate this in *N. castellii*, we inserted *tet* operators at 2–4 kb from NcCEN9 (CEN9L-4) and NcCEN10 (CEN10R-2; Figure 2A). As controls, we also inserted the *tet* operators on chromosome arms (CEN9L-238 and CEN10R-214). CEN9L-238 is also positioned at 4 kb right of the locus corresponding to the ancestor CEN7, based on synteny. The *tet* operators were bound by TetR-GFP fusion proteins [22] and visualized as small GFP dots (Figure 2B). In G1 phase, GFP dots at CEN9L-4 and CEN10R-2 localized in the vicinity of the spindle pole body (SPB), whereas those at CEN9L-238 and CEN10R-214 were at a larger distance from the SPB (Figure 2C). In metaphase, GFP dots at CEN9L-4 and CEN10R-2 located near the axis defined by two SPBs (Figure 2D) and often showed two signals, indicative of sister chromatid separation (Figure 2E). In contrast, the GFP dots at CEN9L-238 or CEN10R-214 did not separate until early anaphase (Figures 2E and 2F), whereas the GFP dots at CEN9L-4 and CEN10R-2 moved immediately after SPB segregation during anaphase (Figure 2B, top). These behaviors of GFP dots at CEN9L-4 and CEN10R-2 are similar to those at the *S. cerevisiae* centromeres [18–21] and consistent with NcCENs indeed being functional centromeres in *N. castellii*.

### *N. castellii* CENs Include Unique Consensus DNA Elements, which Are Crucial for Minichromosome Propagation

We compared DNA sequences at NcCEN1–10, which include Ndc80-enriched regions in ChIP-seq (Figure 1D). Approximately in the middle of the enriched regions, we identified NcCEN consensus DNA sequences (Figures 3A and S2A). In particular, two short DNA elements showed very high similarity in all ten NcCENs at positions 20–26 and 45–52 in Figure 3A, which we name NaCDEI and NaCDEII (*Naumovozyma* consensus DNA element), respectively. In addition, other regions showed similarity or common AT- or GC-rich areas among NcCENs. The overall

(B) Nucleotide sequence of CDEI, II, and III [5, 6]. Logos of nucleotides graphically represent their frequency at individual positions. CDEII is 70–170 bp DNA sequence with >79% AT content.

(C) Localization of Ndc10, Cep3, and Ndc80 in representative *S. cerevisiae* and *N. castellii* cells (in metaphase and anaphase). Ndc10, Cep3, and Ndc80 were tagged with three tandem copies of GFP (3× GFP) in *N. castellii* (T11587, T11584, and T11586, respectively) and with 1× GFP in *S. cerevisiae* (T11520, T11522, and T11521, respectively). Spindle pole body (SPB) components, Spc42 and Spc110, were tagged with 4× mCherry and 1× mCherry in *N. castellii* and *S. cerevisiae*, respectively. Cell shapes are outlined in white. The scale bar represents 1 μm. Metaphase and anaphase are defined by the distance between two SPBs (<2.5 μm and >3 μm, respectively). Note that, during anaphase, CBF3 also localizes on the spindle as well as at kinetochores [9].

(D) Ndc80 (red) shows single-peak localization on each chromosome (Chr) of *N. castellii*. Ndc10 (blue) also shows peaks at the same regions. NDC80-6xHA (T9328) and NDC10-6xHA (T9326) cells were processed for ChIP-seq. Gray bars represent open reading frames of genes; top on Watson strand, bottom on Crick strand. Chromosome positions are shown in length (kilo base pairs [kbp]) from the left telomere. In addition to the positions of Ndc80 peaks, Ndc10 showed two extra peaks (Figure S1A); one of them is at 968 kbp on chromosome 3, as shown here.

(E) Gene order in *S. cerevisiae* and the reconstructed ancestor, aligned around *N. castellii* CENs (yellow box). Gene orders were analyzed using YGOB [10]. Vertical tick bars represent gaps; i.e., genes to the right and left are not neighbors on a chromosome. Two chromosome series of *N. castellii* and *S. cerevisiae* are aligned with one series of the ancestor because *N. castellii* and *S. cerevisiae* are post-WGD yeasts (see A). Orange boxes represent centromeres in the ancestor (AncCEN) and *S. cerevisiae* (ScCEN).

See also Figure S1.

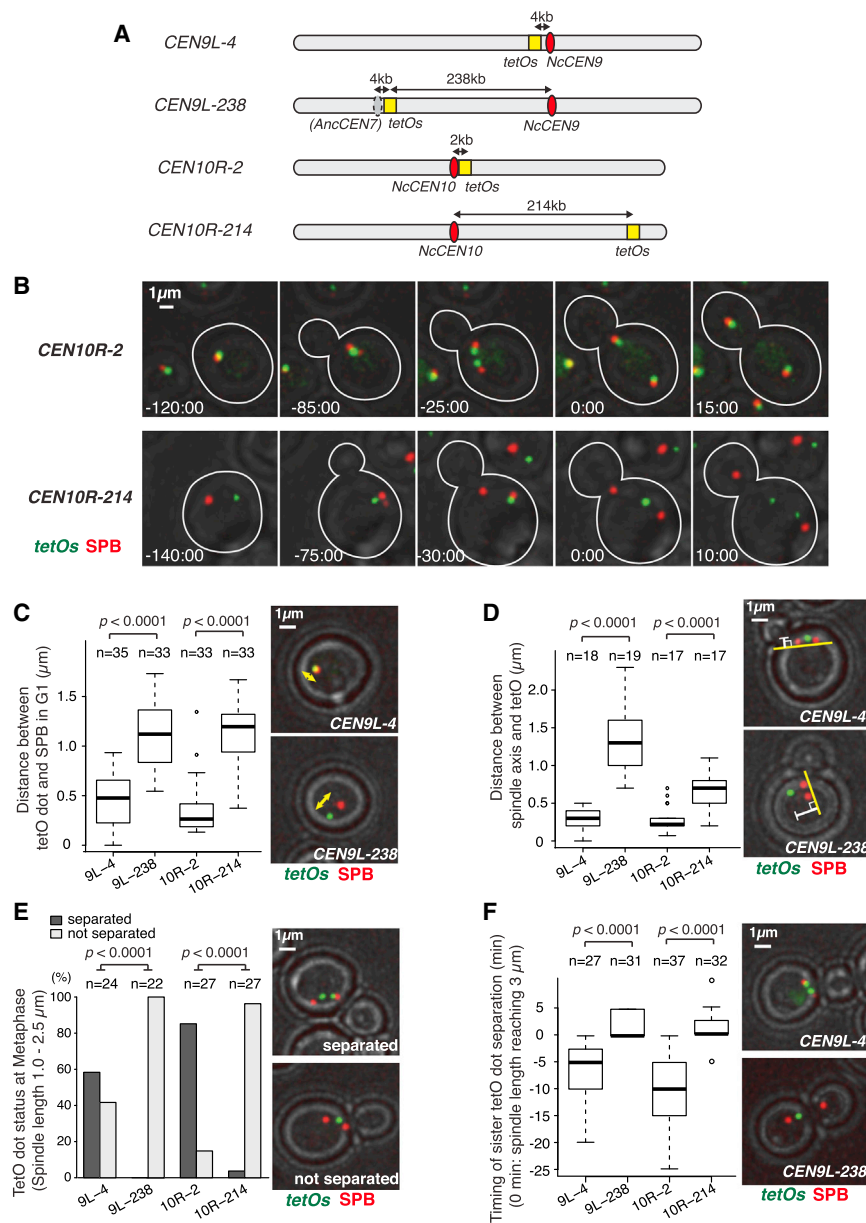

**Figure 2. *N. castellii* Candidate Centromeres Show Dynamic Localizations during the Cell Cycle, which Are Consistent with Those of Functional Centromeres**

(A) Diagram showing positions of the insertion of *tetO* arrays (112 tandem repeats; yellow box) on chromosomes 9 and 10. *NcCEN9* and *NcCEN10* are shown as red ovals. The corresponding position of the ancestor *CEN7* (*AncCEN7*), based on synteny, is shown as a gray oval.

(B) Live-cell images of *tetO* arrays shown in (A). Images of *SPC42-4xmCherry TetR-GFP* cells with *tetOx112* at *CEN10R-2* (T11466) or at *CEN10R-214* (T11467) were acquired every 5 min. Spc42 is an SPB component. Time (min: s) is shown relative to anaphase onset (when the distance between SPBs exceeded 3  $\mu\text{m}$ ). The scale bar represents 1  $\mu\text{m}$ .

(C–F) Analyses of *tetOs* localization in cells. Live-cell images of *SPC42-4xmCherry TetR-GFP* cells with *tetOx112* at *CEN9L-4* (T11501), *CEN9L-238* (T11500), *CEN10R-2* (T11466), or *CEN10R-214* (T11467) were acquired every 5 min. (C) Distance between the SPB and the *tetO* dot in G1 phase is shown (in cells with one SPB but no bud). In box plots, a thick line represents a median; a box shows the range of the first to third quartile (interquartile range: IQR); the upper and lower whiskers show the maximum and minimum values, respectively, which do not exceed 3/2 IQR beyond the box; and open circles show outliers. (D) Distance between the *tetO* dot and the spindle axis in metaphase is shown (cells with two SPBs less than 2  $\mu\text{m}$  apart and with a single *tetO* dot). Box plots are as in (C). (E) Frequency of separation and non-separation of the *tetO* dot in metaphase is shown (cells with two SPBs 1.0–2.5  $\mu\text{m}$  apart). (F) Timing of separation of the *tetO* dot, relative to anaphase onset, is shown (as defined in B). Representative cells show separation of sister *tetO* dots (at *CEN9L-4*) before anaphase onset (top) and no separation of them (at *CEN9L-238*) after anaphase onset (bottom). Box plots are as in (C).

consensus within the 70-bp sequence at positions 20–89 in Figure 3A is unique to *NcCENs* and found at no other regions in the *N. castellii* genome. Remarkably, the consensus found at *N. castellii* *CENs* is very different from the consensus of other point centromeres (*CDE1*, *II*, and *III*; Figure 1B).

We evaluated the activity of candidate centromeres on minichromosomes in *N. castellii* cells. If minichromosomes were able to undergo both DNA replication and mitotic segregation, they are stably propagated during cell proliferation. DNA replication origins have not yet been identified in *N. castellii*, and we investigated the propagation of *pRS306* and *pRS316* plasmids, on which an *S. cerevisiae* centromere and replication origin are absent and present, respectively [23]. *pRS306* and *pRS316* were maintained at high copy number in *N. castellii* cells (>70 per cell; see Figure 3E). Yeast cells accumulate minichromo-

somes with high copy number if their replication occurs normally but segregation is inefficient [25]. We reasoned that, in *N. castellii* cells, an *S. cerevisiae* centromere does not promote minichromosome segregation efficiently, but its replication is supported, even without an *S. cerevisiae* replication origin (Figures S2B–S2D). Notably, addition of *NcCEN1* to *pRS306* caused a marked reduction in its copy number to 3–5 per cell (see Figure 3E; *NcCEN1* WT) and the formation of many more yeast colonies (Figure 3B; *NcCEN1* 1,173 bp). Addition of *NcCEN10* showed similar effects (Figure 3B; *NcCEN10* 589 bp), whereas addition of a control, chromosome arm DNA fragment (A5960–5970) had no such effect (see Figures 3D and 3E). Thus, *N. castellii* *CENs* are able to facilitate minichromosome propagation and yeast colony formation, presumably by promoting mitotic segregation.

To determine the minimum DNA sequence carrying a centromere activity, we examined the ability of several DNA fragments within *NcCEN1* and *NcCEN10* to support minichromosome

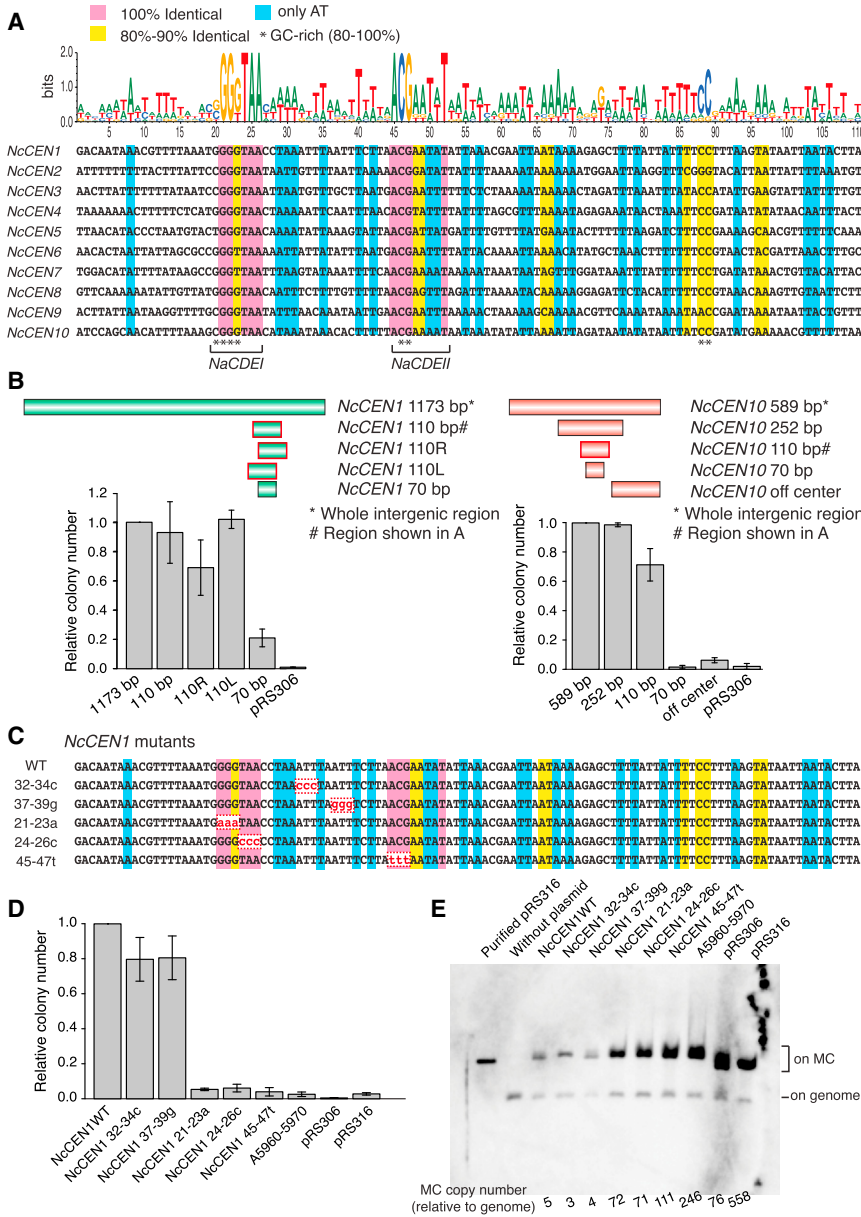

**Figure 3. *N. castellii* CENs Have Unconventional Consensus DNA Elements, which Are Important for Minichromosome Propagation**

(A) Consensus DNA sequence found at *N. castellii* CENs. Logos of nucleotides (top) graphically represent their frequency at individual positions. Nucleotide positions, highlighted in pink and yellow, represent those identical in 100% and 80%–90% *NcCENs*, respectively. Blue shows positions only with A and T, whereas an asterisk shows GC-rich (80%–100%) positions. Two highly conserved elements were named *NaCDEI* (position 20–26) and *NaCDEII* (position 45–52), which are SGGKTA (S: G or C; K: G or T) and ACGDDWWT (D: not C; W: A or T), respectively.

(B) Consensus DNA sequence of 110 bp shows full centromere activity for minichromosome (MC) propagation. The DNA fragments shown in the diagram (top) were inserted into the *pRS306* plasmid, which carries *S. cerevisiae* *URA3* [23] that works as a selection marker in *N. castellii* cells [24]. These DNA constructs were introduced into *N. castellii* haploid cells with *ura3-1* (T11421) for colony formation assay. *NcCEN1* 1,173 bp and *NcCEN10* 589 bp cover the whole intergenic region containing a *Ndc80*-enriched region (Figure 1D). *NcCEN1* 110 bp and *NcCEN10* 110 bp are shown in (A), whereas *NcCEN1* 70 bp and *NcCEN10* 70 bp correspond to positions 20–89 in (A). *NcCEN1* 110 bp DNA sequence was shifted to right and left by 20 bp along the chromosome, making *NcCEN1* 110R and 110L, respectively. Colony numbers are normalized to that with *NcCEN1* 1,173 bp and *NcCEN10* 589 bp. Error bars represent SEM (n = 3).

(C) Mutations introduced to *NcCEN1* DNA sequence (110 bp shown in A). WT, wild-type. (D) Colony formation assay using *NcCEN1* mutants shown in (C). The number of *N. castellii* colonies with a MC carrying each mutant (on 1,173 bp wild-type *NcCEN1*; see B) was normalized to that with wild-type *NcCEN1* (1,173 bp; see B). The A5690–A5970 intergenic DNA fragment (1,071 bp) from a chromosome 1 arm was also integrated into a MC and used as a negative control. Error bars represent SEM (n = 3).

(E) Copy number (per cell) of each MC was evaluated using Southern blots. Genomic and

MC DNA was digested by *Not* I, separated by electrophoresis, blotted, and probed with the ampicillin resistance gene (the host strain has one copy of it at *hoΔ* allele on the genome). The number at the bottom shows a ratio of each MC to the genome (ratio of intensity of hybridized bands). See also Figure S2.

propagation (Figure 3B). The 70-bp sequence at position 20–89 in Figure 3A was essential for centromere activity, and additional 20- to 40-bp sequences around it facilitated the activity. The 20- to 40-bp sequences are not particularly similar among the *NcCENs* (Figure 3A), but their AT richness may contribute to their centromere activity (Table S1) as does the AT-rich *CDEII* in other budding yeasts [13]. Subsequently, we addressed whether the consensus DNA elements *NaCDEI* and *NaCDEII* are important for centromere activity. Three base-pair mutations within the *NaCDEI* (21–23a and 24–26c) and *NaCDEII* (45–47f) of *NcCEN1* (Figure 3C) showed substantial decreases in yeast colony formation (Figure 3D) and high copy numbers of minichromosomes

(>70 per cell), indicative of inefficient segregation (Figure 3E). Three base-pair control mutations between *NaCDEI* and *NaCDEII* (32–34c and 37–39g) showed similar numbers of yeast colonies to wild-type *NcCEN1* (Figure 3D) and maintained low copy numbers of minichromosomes (3–5 per cell; Figure 3E). Thus, *NaCDEI* and *NaCDEII* are important for the centromere activity.

Using these assays, we next evaluated requirement of RNAi for centromere activity in *N. castellii*. This pathway is present in some budding yeasts, including *N. castellii* [26], and required for centromere activity in fission yeast [27]. The centromere activity for minichromosome propagation was still normal without the RNAi pathway in *N. castellii* (Figures S2E and S2F).

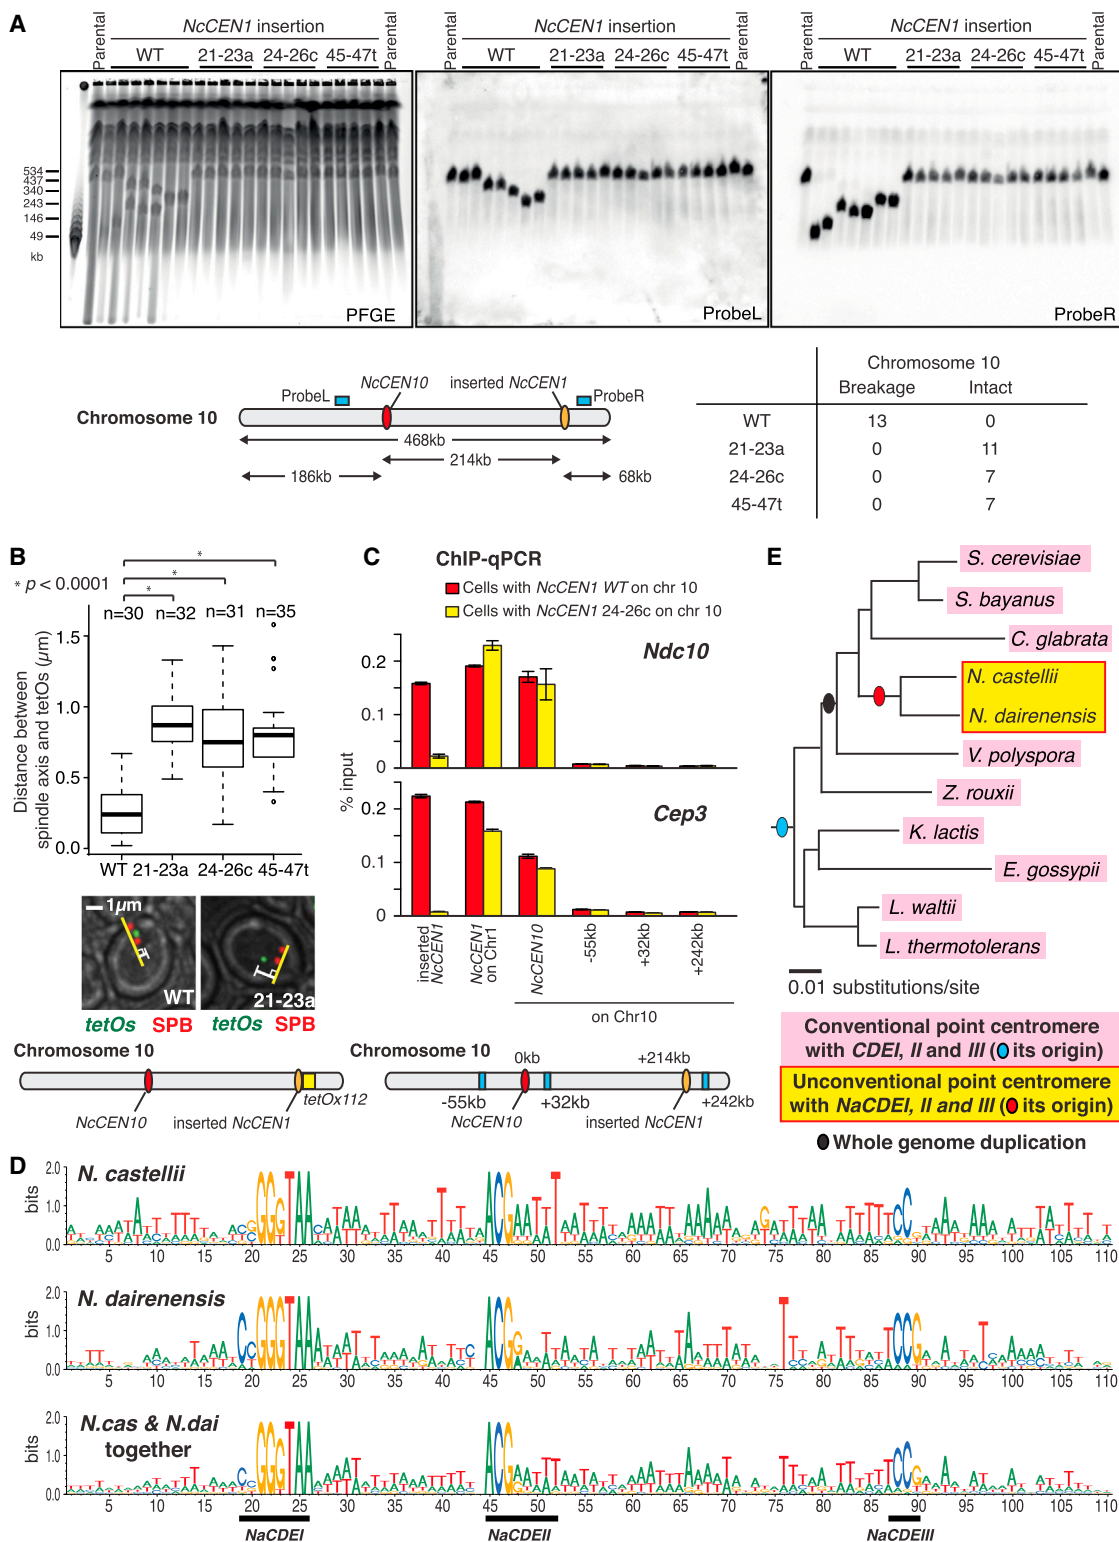

**Figure 4. Consensus DNA Elements in *N. castellii* CENs Are Important for the Centromere Function in the Context of Authentic Chromosomes**

(A) *NcCEN1* wild-type (WT; 1,173 bp; Figure 3B) and its mutants (1,173 bp with 21–23a, 24–26c, and 45–47t; Figure 3C) were inserted at 214 kb right of *NcCEN10* on chromosome 10 (orange oval in diagram) in haploid *N. castellii* cells (T11605). Karyotypes of individual clones were analyzed (representative examples are shown here) by pulsed field gel electrophoresis (PFGE), followed by Southern blots with ProbeL and ProbeR; see positions of the probes in diagram. Table shows the number of clones that did, or did not, show breakage of chromosome 10 (shortening detected by ProbeL and/or ProbeR; Figure S3A).

(legend continued on next page)

### Consensus DNA Elements in *N. castellii* CENs Promote CBF3 Binding and Facilitate Centromere Activity on Authentic Chromosomes

We next addressed whether the centromere DNA elements identified above are also crucial for centromere activity on authentic chromosomes. When an additional active centromere is inserted into a yeast chromosome, it causes chromosome breakage between the original and the newly inserted centromere [28, 29]. We employed this procedure to assess the centromere activity in *N. castellii*. We inserted wild-type and mutated *NcCEN1*s on the chromosome 10 arm (Figure 4A, diagram) and analyzed breakage of this chromosome using pulsed field gel electrophoresis (PFGE), followed by Southern blotting (Figure 4A). After insertion of a wild-type *NcCEN1*, all of 13 randomly chosen clones showed breakage of chromosome 10 (Figures 4A and S3A). By contrast, no such breakage was observed after insertion of *NcCEN1* carrying mutations at *NaCDEI* and *NaCDEII* (21–23a, 24–26c, and 45–47t). Next, we visualized the intracellular localization of wild-type and mutated *NcCEN1*s, inserted on chromosome 10. Wild-type *NcCEN1* on chromosome 10 was near SPBs during telophase to G1 (Figure S3B, left) and on the metaphase spindle with frequent sister separation (Figures 4B and S3B, right). However, mutated *NcCEN1* (21–23a, 24–26c, and 45–47t) did not show such behavior. Thus, *NaCDEI* and *NaCDEII* are crucial for centromere activity on authentic chromosomes.

As shown earlier, CBF3 components Ndc10 and Cep3 bind *NcCENs* (Figures 1D and S1C). To address whether this binding requires *NaCDEs*, we used ChIP followed by qPCR (ChIP-qPCR; Figure 4C). Both Ndc10 and Cep3 showed enrichment at the original *NcCEN1* and wild-type *NcCEN1* inserted on chromosome 10, but not at the mutated *NcCEN1* on chromosome 10 (Figure 4C). Thus, the consensus DNA elements within *NcCEN* are required for CBF3 binding. Furthermore, we found both Ndc10 and Cep3 are essential genes in *N. castellii* (Figure S3C), as is expected if they have central roles in recognizing *NcCENs*.

How can the CBF3 complex, which recognizes standard *CDE I,II,III*-type CENs, also bind *NcCENs* despite the different DNA sequences? We investigated the evolutionary conservation of Ndc10 and Cep3, the CBF3 components recognizing consensus DNA elements in budding yeasts [5, 13]. A putative DNA-binding domain of Cep3 is conserved between *N. castellii* and other budding yeasts [30]. By contrast, the core DNA-binding domain of Ndc10 showed a more-rapid change during evolution of *N. castellii*, compared with other budding yeasts with standard

*CENs* (Figures S3D–S3F). Such a rapid change may have happened to adapt to the new type of point centromere.

### *N. dairenensis*, a Close Relative of *N. castellii*, Has *N. castellii*-like Consensus DNA Elements at Its Candidate Centromere Regions

We next aimed to identify candidate centromeres in *N. dairenensis*, a close relative to *N. castellii* (Figure 1A). Based on the annotated *N. dairenensis* genome [16], we found that the orders of orthologous genes around most *N. castellii* *CENs* are conserved on *N. dairenensis* chromosomes (Figure S4A). Crucially, at the corresponding intergenic regions, we identified *CDEs* that are very similar to *NaCDEI, II* found at *N. castellii* *CENs* (Figures 4D and S4B). It is likely that these regions serve as *N. dairenensis* centromeres, but we could not test this prediction because of a lack of molecular genetics methods in *N. dairenensis*. This analysis revealed a third sequence element with evolutionary conservation (*NaCDEIII*; Figure 4D), but mutagenesis showed that it is not essential for centromere function in *N. castellii* (Figure S4B legend). *N. dairenensis* Ndc10 showed evolutionary changes, similarly to *N. castellii* Ndc10 (Figures S3D–S3F). In conclusion, *N. castellii* *CENs* and *N. dairenensis* candidate centromeres have very similar consensus DNA elements (Figure 4D). The new type of centromere *CDEs* (*NaCDEI, II*, and *III*) originated prior to the branching point of *N. castellii* and *N. dairenensis* in evolution (Figure 4E).

### Conclusions

We have identified centromeres in the budding yeast *N. castellii*. We conclude that they make point centromeres, because (1) consensus DNA elements are found among all ten centromeres, (2) these DNA elements are important for the centromere activity, and (3) a short DNA fragment (110 bp) containing the consensus DNA elements is sufficient for centromere function. Crucially, the consensus centromere DNA elements are very different from those in other known point centromeres, highlighting the *N. castellii* centromere as the first unconventional, i.e., non-*CDE I,II,III*-type, point centromere (Figure 4E). The gene order analyses give the following insights: first, most *N. castellii* centromeres are not located in intergenic regions orthologous to those containing standard *CDEI,II,III*-type point centromeres in other species (Figure S1D), although these two are often in close proximity (Figure S4C). This indicates that these *N. castellii* centromeres did not descend from standard point centromeres at their individual chromosome regions. Second, at most *N. castellii* centromeres, synteny is disrupted when compared with the

(B) *NcCEN1* wild-type (WT; T11632), 21–23a (Figure 3C; T11842), 24–26c (T11843), and 45–47t (T11844), each marked with *tetOx112*, were inserted at 214 kb right of *NcCEN10* on chromosome 10 in *SPC42-4xmCherry TetR-GFP* cells. Cells were imaged, and the distance between the spindle axis and inserted *NcCEN1* was analyzed as in Figure 2D. Box plots are as in Figure 2C.

(C) *NDC10-3xFLAG* cells with inserted *NcCEN1* wild-type (WT; T11845) and 24–26c (T11846), as well as *CEP3-3xFLAG* cells with inserted *NcCEN1* wild-type (WT; T11847) and 24–26c (T11848), were processed for ChIP-qPCR. Diagram shows chromosome loci for quantification by PCR (blue box). Primers for qPCR were designed to distinguish the original *NcCEN1* on chromosome 1 and *NcCEN1* inserted on chromosome 10. Error bars represent SEM ( $n = 3$ ).

(D) *N. dairenensis* candidate centromeres (Figure S4B) have consensus DNA elements, *NaCDEI, II*, and *III*, which are also found at *N. castellii* *CENs* (Figure 3A). Logos of nucleotides graphically represent their frequency at individual positions, in aligned *N. castellii* centromeres (top), *N. dairenensis* candidate centromeres (middle), and both together (bottom).

(E) Conclusion of this study: budding yeasts, highlighted in pink, have point centromeres with *CDEI, II*, and *III*, which are conserved across several species. In contrast, *N. castellii* and *N. dairenensis*, highlighted in yellow, carry unconventional point centromeres with *NaCDEI, II*, and *III*, which have very different DNA sequences from conventional *CDEI, II*, and *III*. Blue and red ovals show the origins of the two types of point centromere in the yeast phylogenetic tree. See also Figures S3 and S4.



ancestral budding yeast genome (Figure 1E). This can be explained if *N. castellii* centromeres were propagated to all chromosomes during evolution through extensive genome rearrangement. The origin of the *N. castellii* centromere is still elusive, but it may have been propagated and superseded the conventional point centromeres.

#### ACCESSION NUMBERS

DNA sequences have been deposited under the following accession codes: ChIP-seq of Ndc80-6xHA, DDBJ: DRA002836; Ndc10-6xHA, DDBJ: DRA003502; Cep3-3xFLAG, DDBJ: DRA002836; Cse4-6xHA, DDBJ: DRA003067; *N. castellii* CEN1-10, DDBJ: LC029901–LC029910; and *N. dairenensis* CEN1-11, DDBJ: BR001264–BR001274.

#### SUPPLEMENTAL INFORMATION

Supplemental Information includes Supplemental Experimental Procedures, four figures, and four tables and can be found with the article online at <http://dx.doi.org/10.1016/j.cub.2015.06.023>.

#### ACKNOWLEDGMENTS

We thank M. Gierlinski and members of the T.U.T., Y.S., C.N., and K.H.W. groups for helpful discussion; L. Clayton for editing the manuscript; J. Piskur, M. Cohn, R. Ciosk, K. Nasmyth, K.E. Sawin, and R.Y. Tsien for reagents; S. Swift for technical help; K.P. Byrne for bioinformatics assistance; and D.P. Bartel for his generous support. This work was supported by the Wellcome Trust (096535 and 097945), European Research Council (322682 and 268893), grants-in-aid from MEXT (KAKENHI; 221S0002), and BBSRC (BB/E023754/1 and BB/K007211/1). T.U.T. is a Wellcome Trust Principal Research Fellow.

Received: February 6, 2015

Revised: April 26, 2015

Accepted: June 10, 2015

Published: July 9, 2015

#### REFERENCES

- Verdaasdonk, J.S., and Bloom, K. (2011). Centromeres: unique chromatin structures that drive chromosome segregation. *Nat. Rev. Mol. Cell Biol.* *12*, 320–332.
- Pluta, A.F., Mackay, A.M., Ainsztein, A.M., Goldberg, I.G., and Earnshaw, W.C. (1995). The centromere: hub of chromosomal activities. *Science* *270*, 1591–1594.
- Dujon, B. (2010). Yeast evolutionary genomics. *Nat. Rev. Genet.* *11*, 512–524.
- Malik, H.S., and Henikoff, S. (2009). Major evolutionary transitions in centromere complexity. *Cell* *138*, 1067–1082.
- Meraldi, P., McAinsh, A.D., Rheinbay, E., and Sorger, P.K. (2006). Phylogenetic and structural analysis of centromeric DNA and kinetochore proteins. *Genome Biol.* *7*, R23.
- Gordon, J.L., Byrne, K.P., and Wolfe, K.H. (2011). Mechanisms of chromosome number evolution in yeast. *PLoS Genet.* *7*, e1002190.
- Hedtke, S.M., Townsend, T.M., and Hillis, D.M. (2006). Resolution of phylogenetic conflict in large data sets by increased taxon sampling. *Syst. Biol.* *55*, 522–529.
- Wolfe, K.H., and Shields, D.C. (1997). Molecular evidence for an ancient duplication of the entire yeast genome. *Nature* *387*, 708–713.
- Zeng, X., Kahana, J.A., Silver, P.A., Morphew, M.K., McIntosh, J.R., Fitch, I.T., Carbon, J., and Saunders, W.S. (1999). Slk19p is a centromere protein that functions to stabilize mitotic spindles. *J. Cell Biol.* *146*, 415–425.
- Byrne, K.P., and Wolfe, K.H. (2005). The Yeast Gene Order Browser: combining curated homology and syntenic context reveals gene fate in polyploid species. *Genome Res.* *15*, 1456–1461.
- Wolfe, K.H. (2006). Comparative genomics and genome evolution in yeasts. *Philos. Trans. R. Soc. Lond. B Biol. Sci.* *361*, 403–412.
- Cliften, P.F., Fulton, R.S., Wilson, R.K., and Johnston, M. (2006). After the duplication: gene loss and adaptation in *Saccharomyces* genomes. *Genetics* *172*, 863–872.
- Hyman, A.A., and Sorger, P.K. (1995). Structure and function of kinetochores in budding yeast. *Annu. Rev. Cell Dev. Biol.* *11*, 471–495.
- He, X., Rines, D.R., Espelin, C.W., and Sorger, P.K. (2001). Molecular analysis of kinetochore-microtubule attachment in budding yeast. *Cell* *106*, 195–206.
- Cliften, P., Sudarsanam, P., Desikan, A., Fulton, L., Fulton, B., Majors, J., Waterston, R., Cohen, B.A., and Johnston, M. (2003). Finding functional features in *Saccharomyces* genomes by phylogenetic footprinting. *Science* *301*, 71–76.
- Gordon, J.L., Armisen, D., Proux-Wéra, E., ÓhÉigeartaigh, S.S., Byrne, K.P., and Wolfe, K.H. (2011). Evolutionary erosion of yeast sex chromosomes by mating-type switching accidents. *Proc. Natl. Acad. Sci. USA* *108*, 20024–20029.
- Gordon, J.L., Byrne, K.P., and Wolfe, K.H. (2009). Additions, losses, and rearrangements on the evolutionary route from a reconstructed ancestor to the modern *Saccharomyces cerevisiae* genome. *PLoS Genet.* *5*, e1000485.
- He, X., Asthana, S., and Sorger, P.K. (2000). Transient sister chromatid separation and elastic deformation of chromosomes during mitosis in budding yeast. *Cell* *101*, 763–775.
- Goshima, G., and Yanagida, M. (2000). Establishing biorientation occurs with precocious separation of the sister kinetochores, but not the arms, in the early spindle of budding yeast. *Cell* *100*, 619–633.
- Tanaka, T., Fuchs, J., Loidl, J., and Nasmyth, K. (2000). Cohesin ensures bipolar attachment of microtubules to sister centromeres and resists their precocious separation. *Nat. Cell Biol.* *2*, 492–499.
- Pearson, C.G., Maddox, P.S., Salmon, E.D., and Bloom, K. (2001). Budding yeast chromosome structure and dynamics during mitosis. *J. Cell Biol.* *152*, 1255–1266.
- Michaelis, C., Ciosk, R., and Nasmyth, K. (1997). Cohesins: chromosomal proteins that prevent premature separation of sister chromatids. *Cell* *91*, 35–45.
- Sikorski, R.S., and Hieter, P. (1989). A system of shuttle vectors and yeast host strains designed for efficient manipulation of DNA in *Saccharomyces cerevisiae*. *Genetics* *122*, 19–27.
- Astromskas, E., and Cohn, M. (2007). Tools and methods for genetic analysis of *Saccharomyces castellii*. *Yeast* *24*, 499–509.
- Hieter, P., Mann, C., Snyder, M., and Davis, R.W. (1985). Mitotic stability of yeast chromosomes: a colony color assay that measures nondisjunction and chromosome loss. *Cell* *40*, 381–392.
- Drinnenberg, I.A., Weinberg, D.E., Xie, K.T., Mower, J.P., Wolfe, K.H., Fink, G.R., and Bartel, D.P. (2009). RNAi in budding yeast. *Science* *326*, 544–550.
- Lejeune, E., and Allshire, R.C. (2011). Common ground: small RNA programming and chromatin modifications. *Curr. Opin. Cell Biol.* *23*, 258–265.
- Haber, J.E., and Thorburn, P.C. (1984). Healing of broken linear dicentric chromosomes in yeast. *Genetics* *106*, 207–226.
- Brock, J.A., and Bloom, K. (1994). A chromosome breakage assay to monitor mitotic forces in budding yeast. *J. Cell Sci.* *107*, 891–902.
- Bellizzi, J.J., 3rd, Sorger, P.K., and Harrison, S.C. (2007). Crystal structure of the yeast inner kinetochore subunit Cep3p. *Structure* *15*, 1422–1430.

**Current Biology**

**Supplemental Information**

**Discovery of an Unconventional Centromere  
in Budding Yeast Redefines  
Evolution of Point Centromeres**

**Norihiko Kobayashi, Yutaka Suzuki, Lori W. Schoenfeld, Carolin A. Müller, Conrad  
Nieduszynski, Kenneth H. Wolfe, and Tomoyuki U. Tanaka**

**A**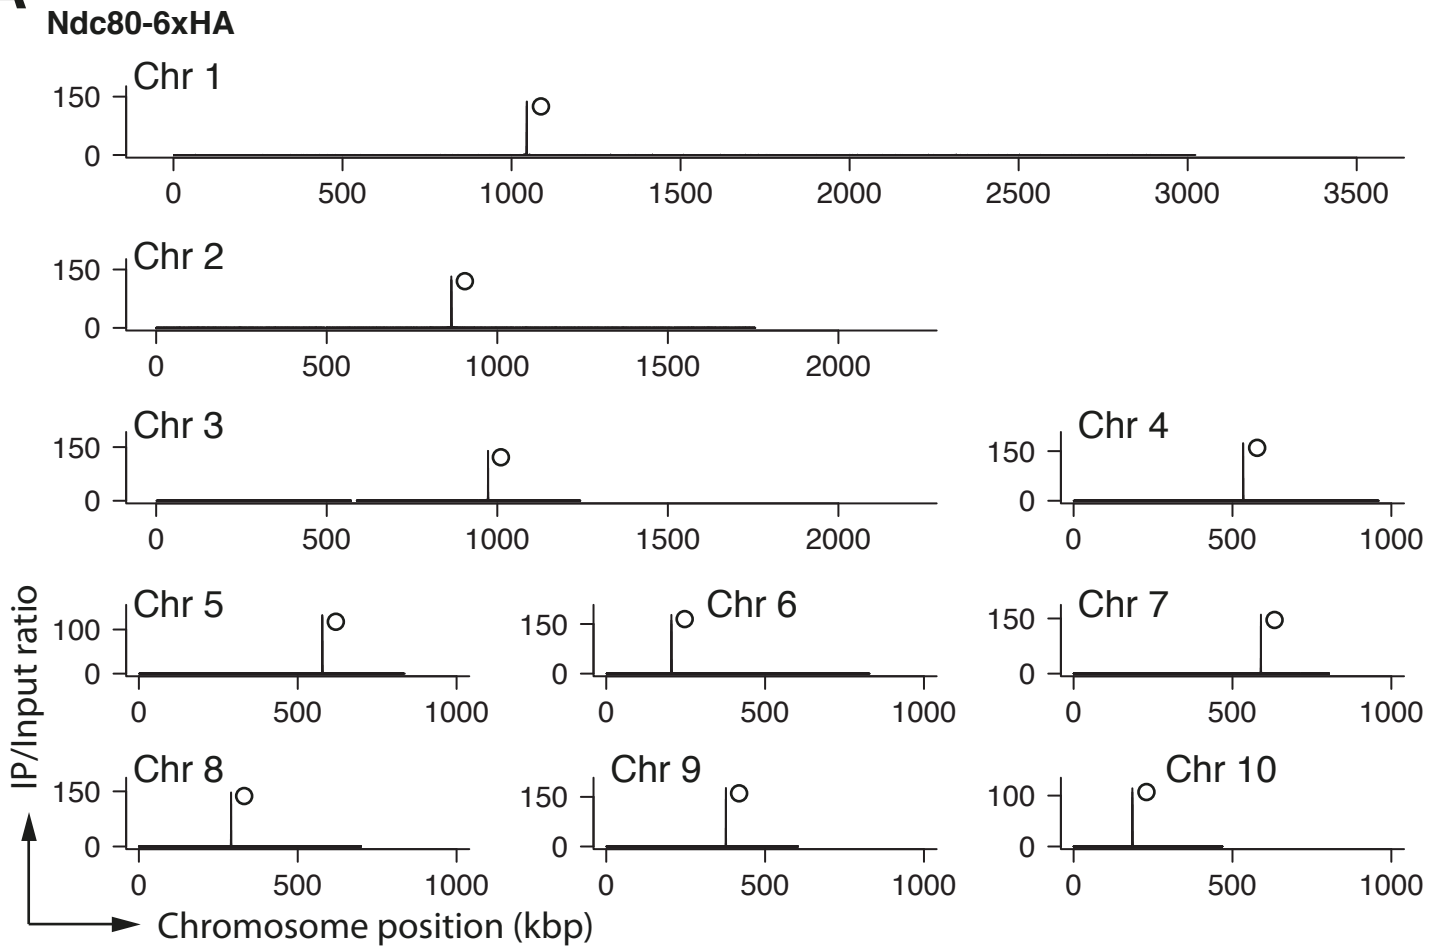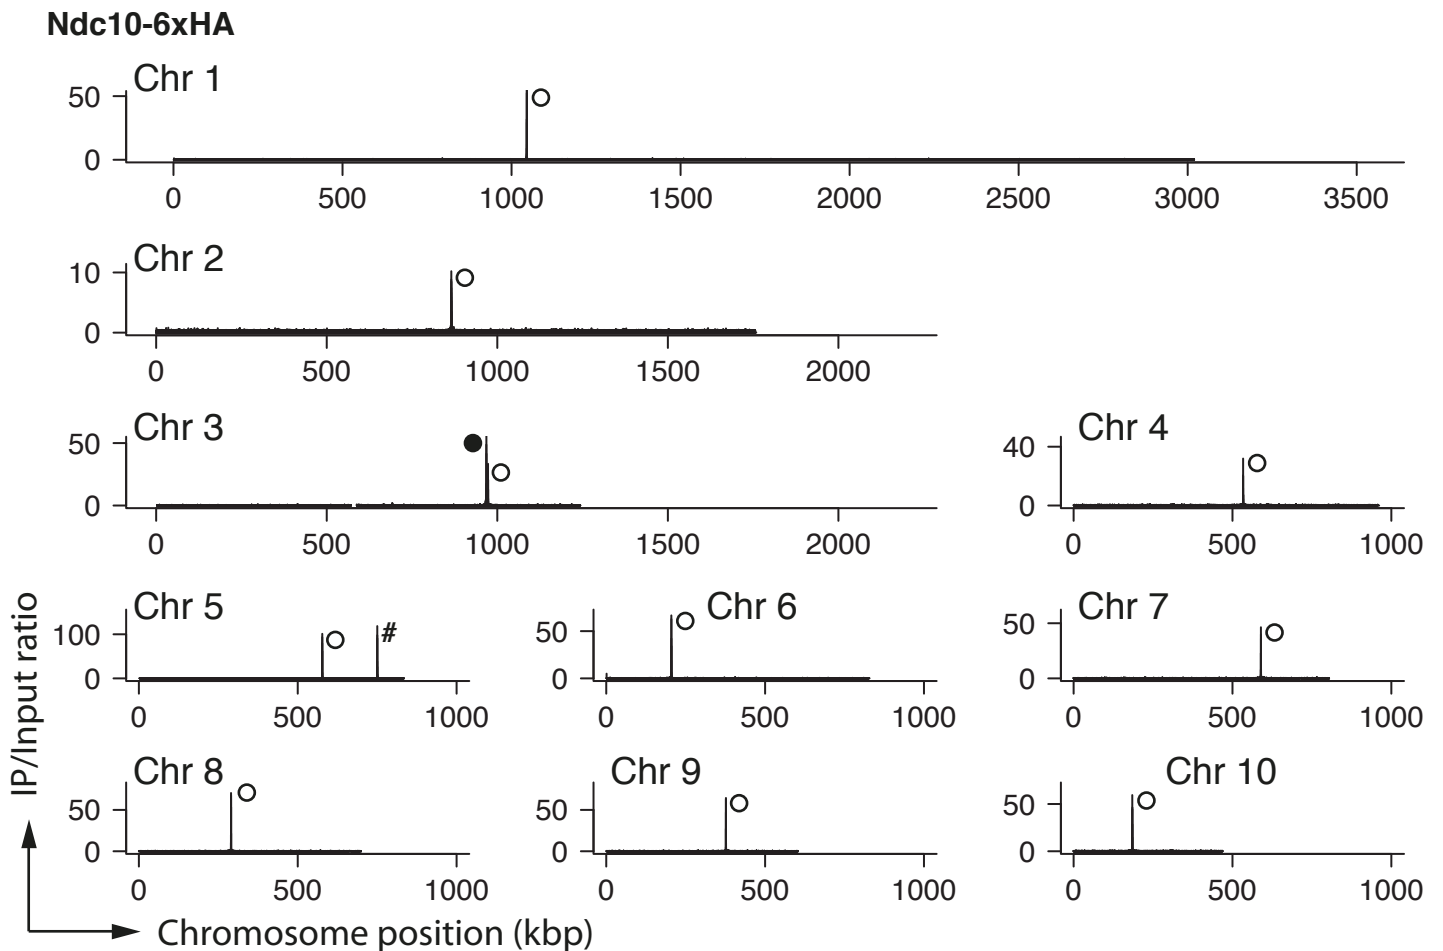

○ Peaks in Ndc80, Cse4, Ndc10 & Cep3 ChIP-seq    # Peaks in Ndc10 & Cep3 ChIP-seq  
 ● Peaks in Cse4, Ndc10 & Cep3 ChIP-seq    @ Peaks in Cep3 ChIP-seq

**B****Cse4-6xHA**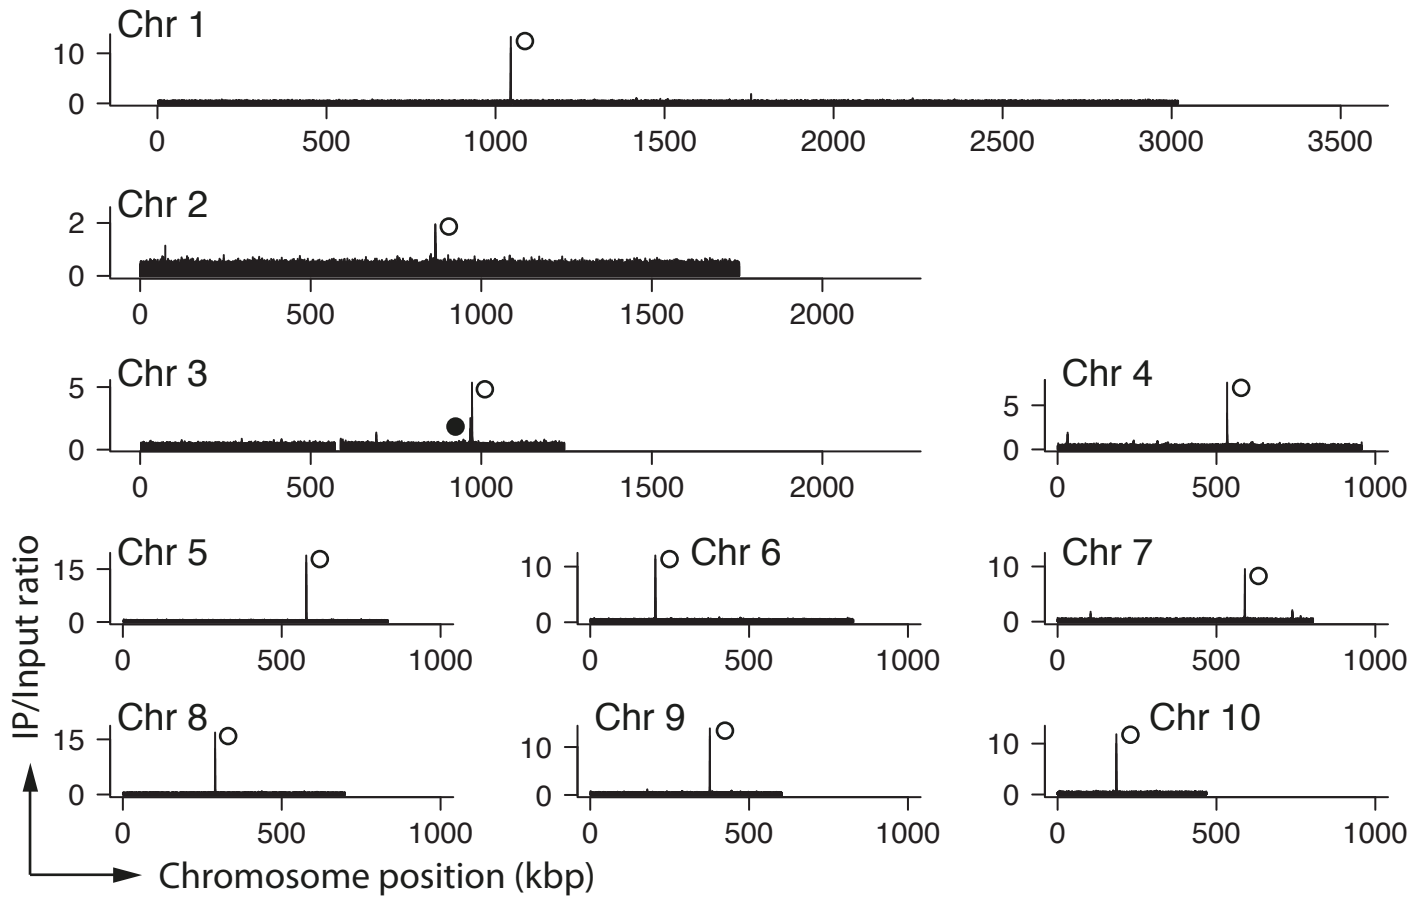**Cep3-3xFLAG**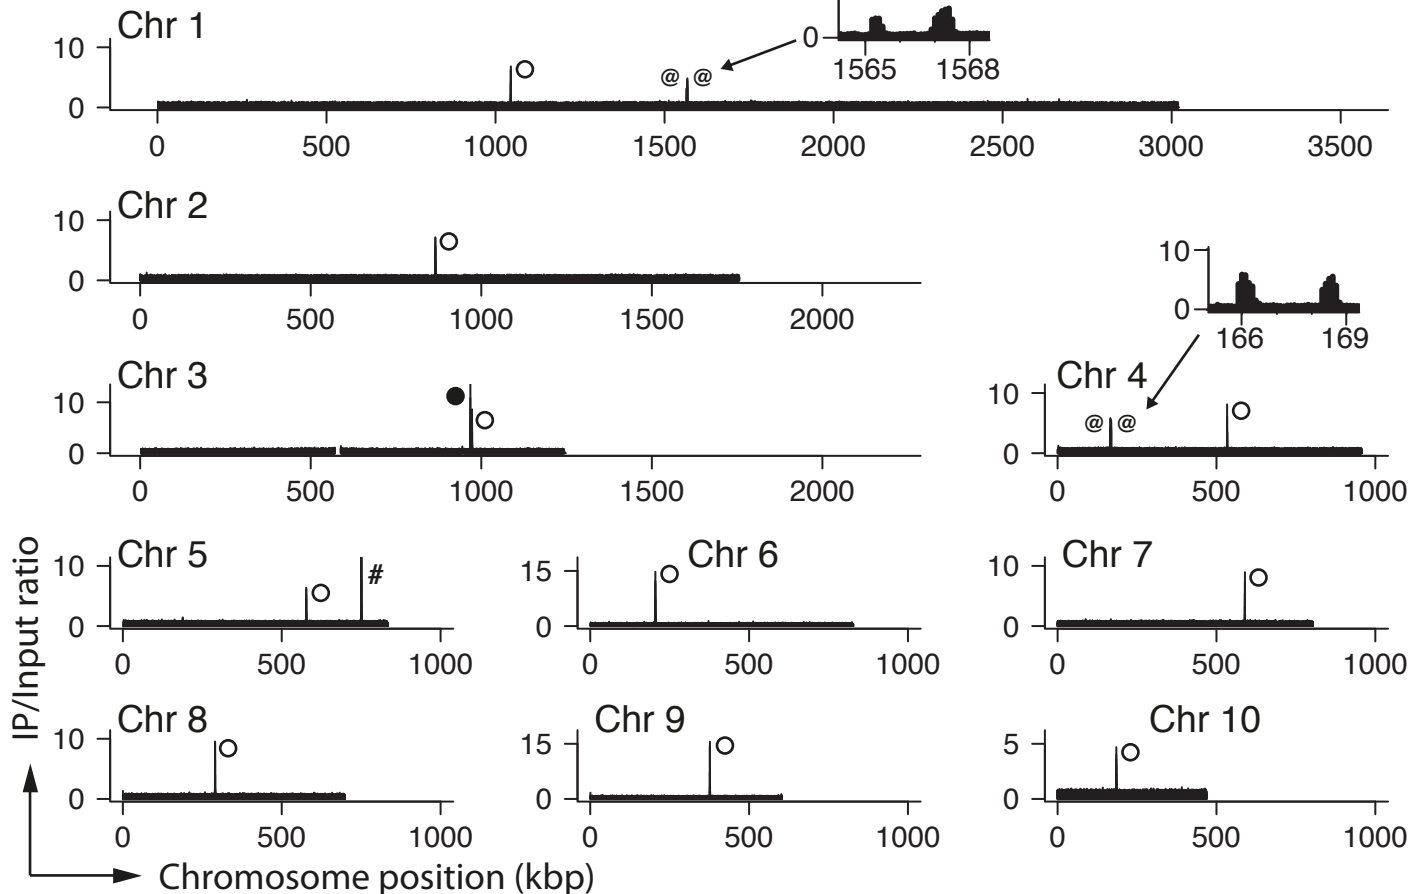

○ Peaks in Ndc80, Cse4, Ndc10 &amp; Cep3 ChIP-seq

● Peaks in Cse4, Ndc10 &amp; Cep3 ChIP-seq

# Peaks in Ndc10 &amp; Cep3 ChIP-seq

@ Peaks in Cep3 ChIP-seq

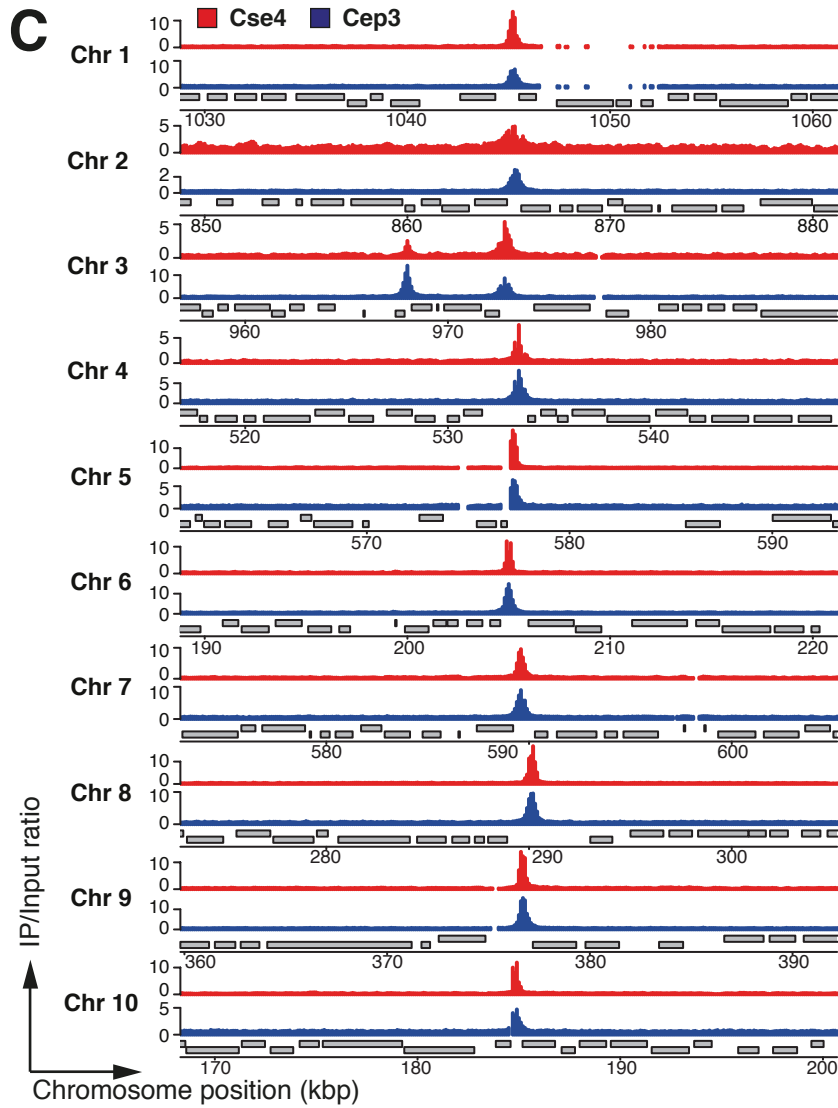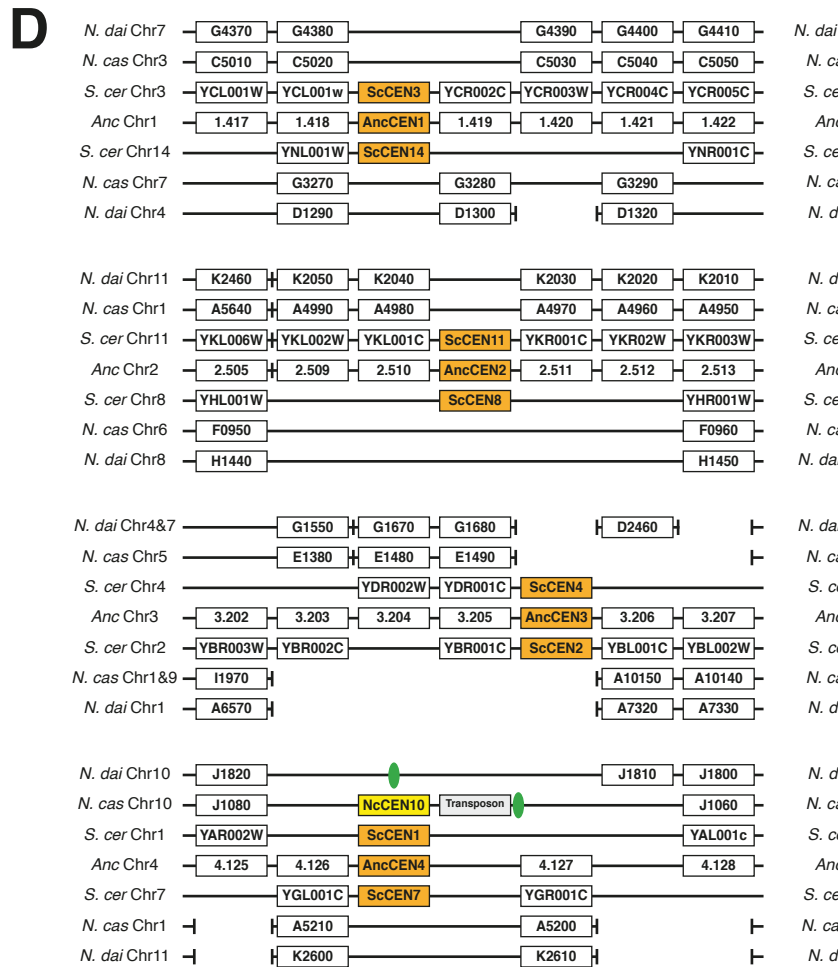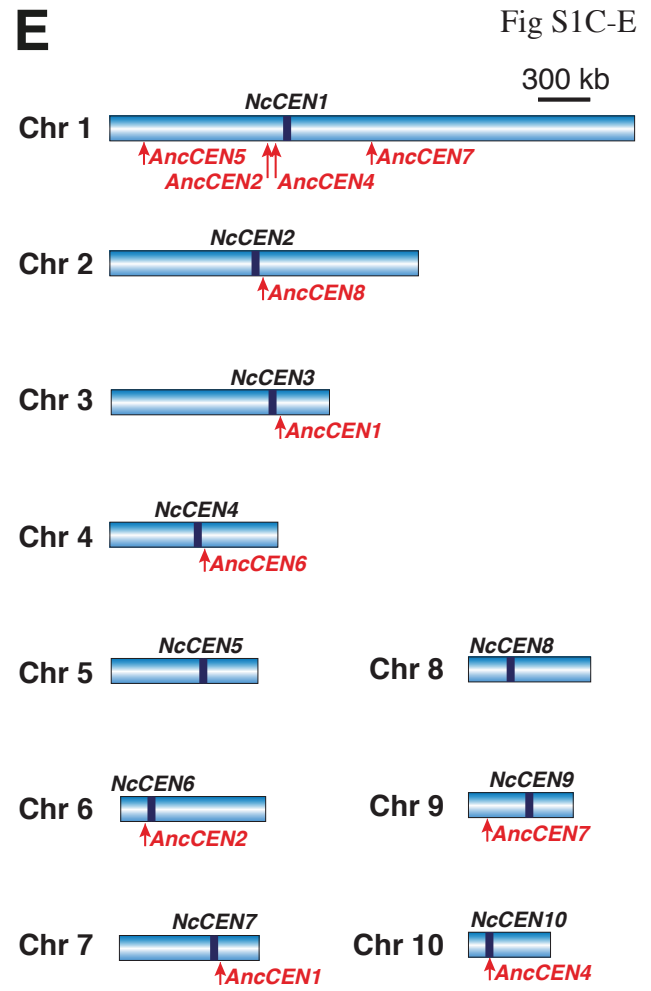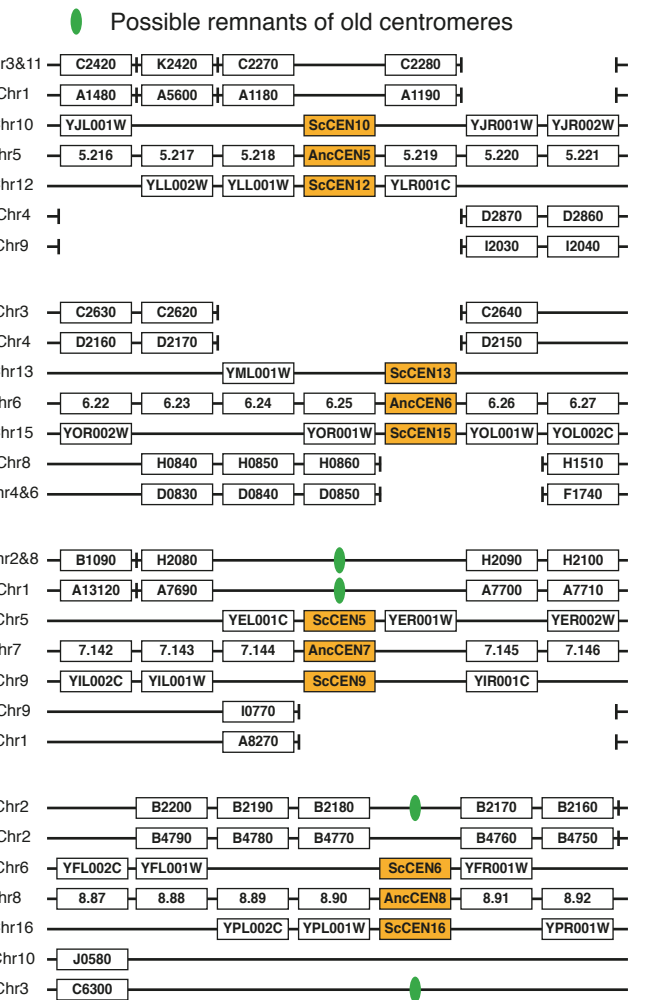

## Figure S1. Supplemental Figures associated with Figure 1.

**(A) Genome-wide ChIP-seq data of Ndc80 and Ndc10.** *NDC80-6xHA* (T9328) and *NDC10-6xHA* (T9326) cells were processed for ChIP-seq and results are shown genome wide. Chromosome positions are shown as length (kilo base pair; kbp) from the left telomere. Ndc80 ChIP gave a distinct single peak (open circles) at an intergenic region on each of all 10 chromosomes (Figure 1D). Ndc10 ChIP gave 10 peaks at the same regions as Ndc80 (open circles; Figure 1D) and, in addition, two extra peaks; one of the two extra peaks locates between C4740 and C4750 on chromosome 3 (closed circle; Figure 1D), the other is between E3810 and E3820 on chromosome 5 (marked with #).

**(B) Genome-wide ChIP-seq data of Cse4 and Cep3.** *CSE4-6xHA* (T9377) and *CEP3-3xFLAG* (T11450) cells were processed for ChIP-seq and results are shown genome wide. Chromosome positions are shown as length (kilo base pair; kbp) from the left telomere. Cse4 ChIP gave 10 peaks at the same regions as Ndc80 (open circles; Figure S1C) and, in addition, one extra peak that is in common with Ndc10 ChIP (closed circle, between C4740 and C4750 on chromosome 3; Figure S1C). Cep3 ChIP gave 10 peaks at the same regions as Ndc80 (open circles; Figure S1C) and, in addition, six extra peaks; one is in common with Ndc10 and Cse4 ChIP (closed circle, between C4740 and C4750 on chromosome 3; Figure S1C), one is common with Ndc10 but not with Cse4 (marked with #, between E3810 and E3820 on chromosome 5), and four are unique in Cep3 ChIP (two twin peaks, marked with @ and also shown in a magnified scale; between A7860 and A7870 and between A7870 and A7880 on chromosome 1, between D0880 and D0890 and between D0890 and D0900 on chromosome 4). The intergenic region between C4740 and C4750 on chromosome 3, where a peak is found commonly in Ndc10, Cse4 and Cep3 ChIP (closed circle; Figures 1D, S1C), contains DNA sequence GGGTAA + 18 nucleotides + AAG, which is very similar (but not identical) to centromere DNA consensus *NaCDEI* and *NaCDEII* (see Figure 3A). Other extra peaks in Ndc10 and Cep3 ChIP (marked with # and @) do not contain DNA sequence that is obviously similar to *NaCDEs*, and the reason for Ndc10 and Cep3 accumulation is currently unclear.

**(C) ChIP-seq data of Cse4 and Cep3 around the regions with Ndc80 peaks.** ChIP-seq results of Cse4 (red) and Cep3 (blue) are shown in the same chromosome regions as shown in Figure 1D. Gray bars represent open reading frames of genes; top on Watson strand, bottom on Crick strand. Chromosome positions are shown as length (kilo base pair; kbp) from the left telomere. In addition to ten intergenic regions with Ndc80 peaks (on each of ten chromosomes; Figure 1D), Cse4 showed an extra peak at 968 kbp on chromosome 3 (where Cep3 also showed a peak), as shown in this figure. Data are absent at some chromosome regions where DNA sequence is repetitive (e.g. around 1050 kbp on chromosome 1).

**(D) Gene order in *S. cerevisiae*, *N. castellii* and *N. dairenensis*, aligned around the centromeres of the reconstructed ancestral yeast.** Gene orders were analyzed using YGOB [S1-3]. Orange boxes show centromeres in the reconstituted ancestor (*AncCEN*) [S2] and *S. cerevisiae* (*ScCEN*). Yellow boxes show *N. castellii* *CENs* (*NcCEN*). Vertical tick bars represent gaps, i.e. genes at their right and left are not neighbors on a chromosome. Two chromosome series of *S. cerevisiae* (*S. cer*), *N. castellii* (*N. cas*) and *N. dairenensis* (*N. dai*) are aligned with one series of the ancestor (*Anc*), because *S. cerevisiae*, *N. castellii* and *N. dairenensis* are post-WGD yeasts (Figure 1A).

This figure, together with Figure 1E, suggests that *N. castellii*'s *CEN* locations are not syntenic to the *CENs* in the ancestor. Indeed, the gene order across the majority of

the ancestral centromeric regions (i.e. from their left to right along a chromosome) — regions around *AncCEN1*, 2, 4, 5, 7 and 8 — is also conserved without rearrangement on *N. castellii* chromosomes (excluding the *CENs* themselves), but *N. castellii*'s *CEN* locations are not syntenic to the *CENs* in the ancestor. For example, the inferred centromere of ancestral chromosome 2 (*AncCEN2*) lies between genes *Anc\_2.510* and *Anc\_2.511*, which correspond to genes *A4980* and *A4970* on *N. castellii* chromosome 1. However, the ChIP-seq data show that the centromere of *N. castellii* chromosome 1 is between genes *A5270* and *A5280*, about 53 kb away from the ancestral site (Figure 1E).

Note that we found two and four possible remnants of old centromeres on the *N. castellii* and *N. dairenensis* genome, respectively (green ovals), in the following intergenic regions that correspond to the location of the ancestral *CENs* (based on synteny):

A7690–A7700 (*N. castellii*); TTCCGAA

J1060–transposon (*N. castellii*); ATCCGAA

J1810–J1820 (*N. dairenensis*); CAGCTG (214 bp; 70%AT) TTCCGAA

H2080–H2090 (*N. dairenensis*); CATATG (75 bp; 69%AT) TACCGAA

B2170–B2180 (*N. dairenensis*); AACCGAA

C6300–C6310 (*N. dairenensis*); CACGTG (59 bp; 68%AT) TACCGAA

All of them contain core *CDEIII*-like sequences (WWCCGAA [W: A or T]), and three of them are accompanied by the *CDEI*-like sequence (CAXXTG) (see Figure 1B). The two *CDEIII*-like sequence in *N. castellii* were not bound by the Ndc80 Ndc10, Cse4 or Cep3 in ChIP-seq.

**(E) Positions of candidate *N. castellii* centromeres on chromosomes.** Diagram of *N. castellii* chromosomes, showing presumed locations of centromeres. *AncCEN1* etc indicate corresponding centromere positions in a reconstructed ancestor (see text), in cases where gene order is conserved at ancestral centromere sites (see A). Because of the WGD, each centromere in the ancestral genome should in principle map onto two sites in the *N. castellii* genome, but due to rearrangements some of them cannot be mapped.

Note that, while we were preparing this manuscript, Koszul's group predicted the positions of *N. castellii* centromeres genome-wide [S4]. They used a chromosome conformation capture technique, based on the assumption that centromeres should locate closely to a spindle pole. In their study, *NcCEN3* and *NcCEN9* were mapped to the same intergenic regions as those in our study (Figures 1D, S1C). In contrast, other centromeres were positioned 0.6–3.0 kb away from ours, in the next intergenic region or on a neighboring open reading frame etc. This difference is probably due to a higher resolution of our ChIP-seq method (Figure 1D, S1C).

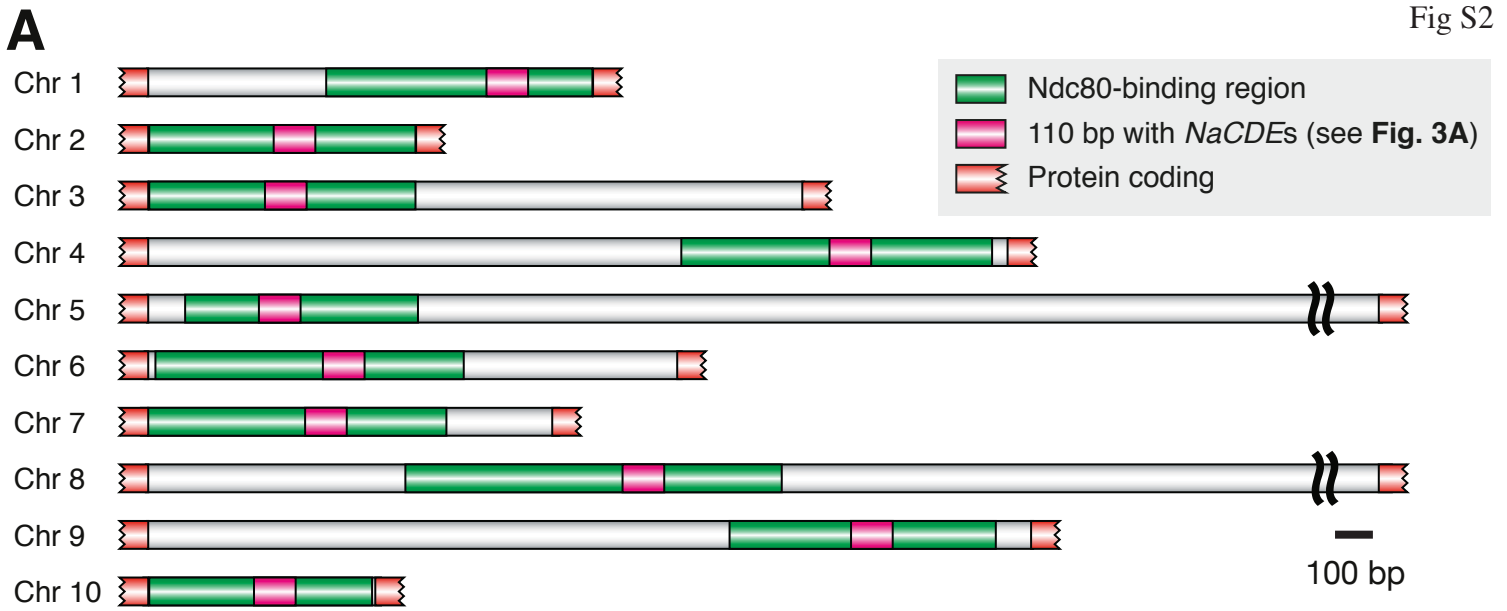**B**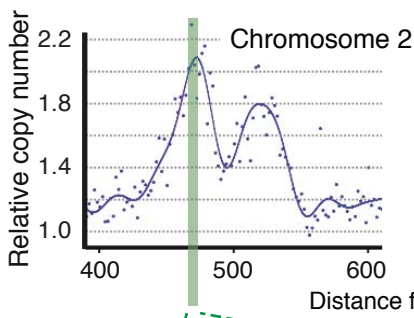**D**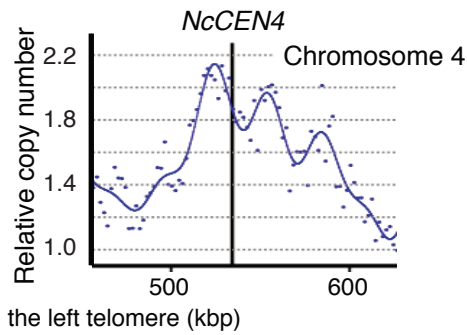**C**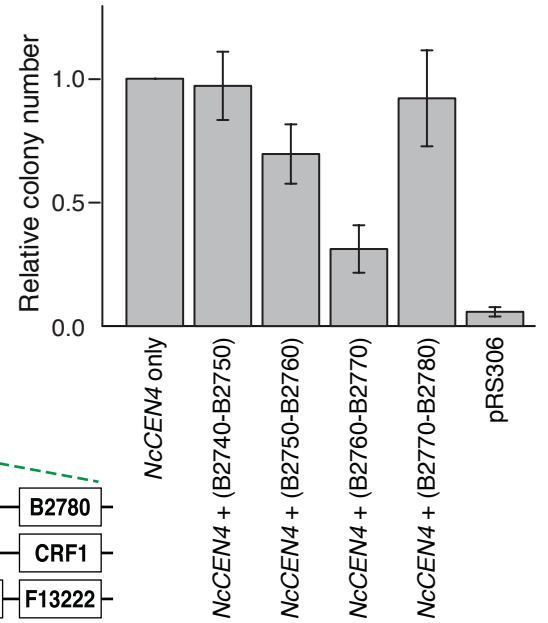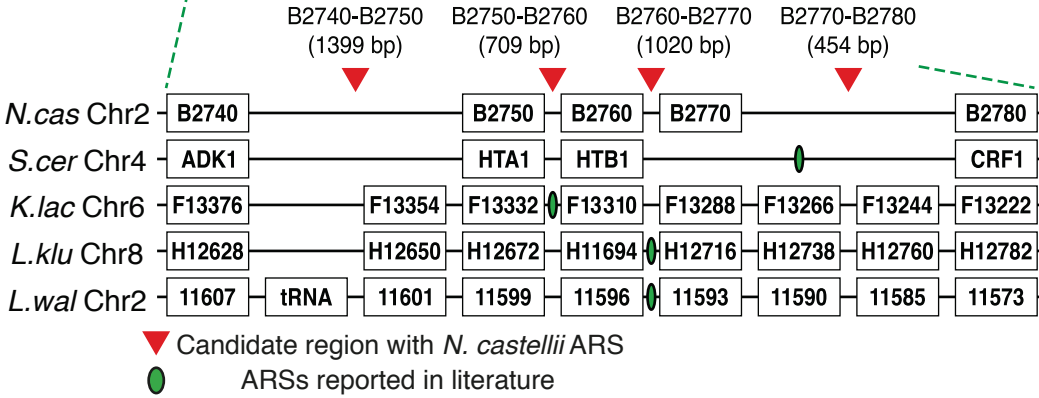**E**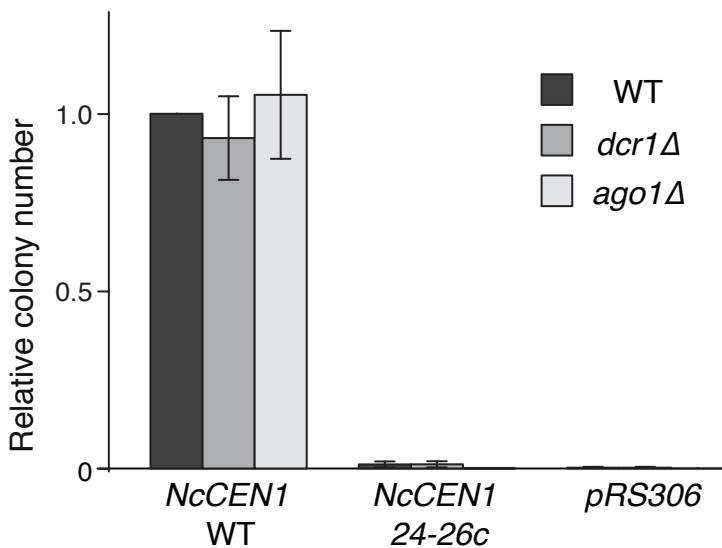**F**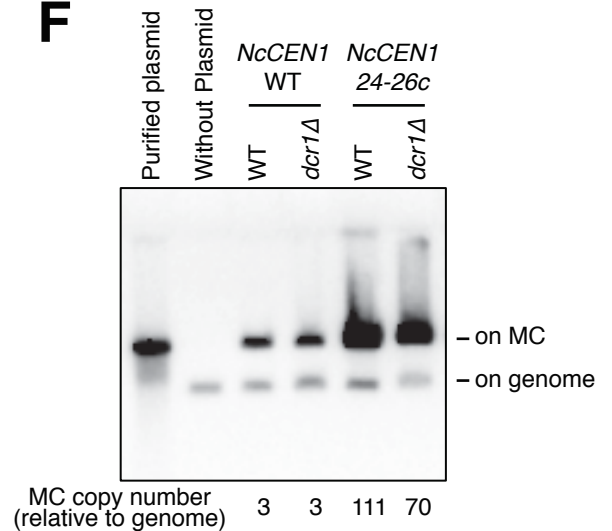



## Figure S2. Supplemental Figures associated with Figure 3.

**(A) Diagram of intergenic regions where Ndc80 is enriched.** Green bars represent chromosome regions where ChIP-seq shows enrichment of Ndc80. Orange bars show protein coding regions. Pink bars represent 110 bp DNA fragments (shown in Figure 3A) where consensus DNA sequences are identified. Scale bar, 100 bp.

**(B–D) *pRS306*-based minichromosomes may replicate efficiently in *N. castellii* cells.** We found that *pRS306* was maintained at a high-copy number in *N. castellii* cells (> 70 copies per cell; Figure 3E). Addition of *N. castellii* *CEN1* to *pRS306* led to a marked reduction in copy-number of the minichromosome (to 3–5 copies per cell; Figure 3E, *NcCEN1* WT) and to formation of many more yeast colonies (Figure 3B). These results suggest that *pRS306* is able to replicate in *N. castellii* cells. However, it is still unclear how efficiently this replication happens in *N. castellii* cells, and we addressed this question. If replication is not efficient, addition of an efficient replication origin may improve propagation of *pRS306* with *N. castellii* *CEN*, thus increasing the number of *N. castellii* colonies with this minichromosome. Replication origins have been identified in several budding yeast species [S5-8]. However, they have not yet been identified in *N. castellii*, so we used candidate DNA fragments, derived from the *N. castellii* genome, which likely carry an efficient replication origin. **B** shows replication timing profile around the histone H2 cluster (top), which is taken from a genome-wide replication timing profile of *N. castellii* (Müller and Nieduszynski, unpublished). In the replication timing profile, high and low relative copy numbers represent replication in early and late S phase, respectively [S9]. The gene order is aligned in the histone H2 cluster region of *N. castellii*, *S. cerevisiae*, *K. lactis*, *L. kluyveri* and *L. waltii* (bottom). Green ovals show positions of previously identified replication origins (ARS; autonomously replicating sequence) [S6-8]. Red arrowheads show candidate intergenic regions for the origin activity in *N. castellii*. We inserted DNA fragments of these intragenic regions into *pRS306*, together with *N. castellii* *CEN4* (841 bp). **C** shows results of colony formation assay. Colony formation was evaluated after introducing each minichromosome into T11421 (*hoΔ ura3-1*) cells. The number of colonies with each minichromosome was normalized to that with *pRS306* plus *N. castellii* *CEN4*. Error bar represents SEM (n=3). **D** shows replication timing profiles around *N. castellii* *CEN4*, which is taken from a genome-wide replication timing profile of *N. castellii* (Müller and Nieduszynski, unpublished). We interpret the results as follows: It is likely that at least one of the four intergenic regions, shown by red arrowheads in **B**, carries an efficient replication origin, because 1) other budding yeast species have origin activity (ARS) at one of the intergenic regions of the histone H2 cluster, and this replication origin is important for the early replication of histone genes, which is thought to be required for timely histone supply during S phase [S8, S10]; and 2) there is a peak in the replication timing profile within this cluster in *N. castellii*, suggesting the presence of a replication origin. On the other hand, it is unlikely that the *N. castellii* *CEN4* DNA fragment carries an efficient replication origin, as there is no peak at *NcCEN4* in the replication timing profile. In the colony formation assay, the addition of *N. castellii* *CEN4* to *pRS306* markedly increased the number of colonies. However, none of the intergenic DNA fragments added to *pRS306* with *N. castellii* *CEN4* led to a further increase in colony number. Therefore, if as we predict, at least one of the intergenic DNA fragments indeed carries an efficient replication origin, it is likely that *pRS306* itself can already replicate efficiently in *N. castellii* cells. We speculate that, in *N. castellii* cells, *pRS306* may show promiscuous replication initiation from multiple sites, or it may carry an origin activity on its particular DNA sequence.

**(E, F) RNAi may not be required for the centromere activity in *N. castellii*.** RNA interference (RNAi) is a gene-silencing pathway triggered by double-stranded RNA [S11]. This pathway is present in some budding yeasts, including *N. castellii*, while it was lost in other budding yeasts during their evolution [S12]. Given that RNAi is important for centromere activity in fission yeast [S11], we addressed if RNAi is required for centromere activity in *N. castellii*. In **E**, *dcr1* $\Delta$  (T11420) and *ago1* $\Delta$  (T11459) strains of *N. castellii* were used for colony formation assay. Minichromosomes (MCs) with *NcCEN1* wild-type (WT), *NcCEN1* mutant 24–26c (see [Figure 3C](#)) and *pRS306* were introduced, and colony numbers were counted, as in [Figure 3B, D](#). Colony numbers were normalized to wild-type (*WT*, *AGO1+* *DCR1+*; T11421) cells with *NcCEN1* wild-type. Error bars represent SEM (n=3). Normalized colony numbers with *NcCEN1* 24-26c and *pRS306* were as follows (mean $\pm$ SEM): *NcCEN1* 24-26c; 0.012 $\pm$ 0.008 (*wild-type*), 0.012 $\pm$ 0.009 (*dcr1* $\Delta$ ), 0.001 $\pm$ 0.001 (*ago1* $\Delta$ ). *pRS306*; 0.002 $\pm$ 0.002 (*wild-type*), 0.002 $\pm$ 0.002 (*dcr1* $\Delta$ ), 0.000 $\pm$ 0.000 (*ago1* $\Delta$ ). Thus, with wild-type *NcCEN1*, wild-type, *dcr1* $\Delta$  and *ago1* $\Delta$  strains showed similar numbers of colonies, which were reduced when the *NcCEN1* mutant was used. In **F**, we analyzed the copy number of MCs in *wild-type* and *dcr1* $\Delta$  cells, using the Southern blot. Genomic and MC DNA was digested, separated, blotted and probed (with the ampicillin resistance gene) as in [Figure 3E](#). The ampicillin resistance gene was integrated on the genome of these cells and also carried by MCs. In both cells, MCs with wild-type *NcCEN1* showed a low copy number (3 per cell), while those with mutant *NcCEN1* showed a high copy number (70–111 per cell). Note that *ago1* $\Delta$  cells did not have the ampicillin resistance gene integrated on the genome and could not be analyzed with the same probe. Collectively, these results suggest that *dcr1* $\Delta$  and *ago1* $\Delta$  cells support the activity of *NcCEN1*, as do wild-type cells. Thus, RNAi system may not be required for centromere activity in *N. castellii*. Note that Drinnenberg *et al.* originally reported that *N. castellii* has a basic RNAi system [S12], and suggested that RNAi is required for plasmid stability. Their study used *pRS316*, but we find this plasmid does not carry an active centromere for *N. castellii* (see [Figure 3B, D, E](#)); therefore we do not think their study directly addressed the RNAi requirement for centromere activity in *N. castellii*.

| Probe L | Chromosome 10 |           | Probe R | Chromosome 10 |           |
|---------|---------------|-----------|---------|---------------|-----------|
|         | Shortened     | Unchanged |         | Shortened     | Unchanged |
| WT      | 10            | 3         | WT      | 13            | 0         |
| 21-23a  | 0             | 11        | 21-23a  | 0             | 11        |
| 24-26c  | 0             | 7         | 24-26c  | 0             | 7         |
| 45-47t  | 0             | 7         | 45-47t  | 0             | 7         |

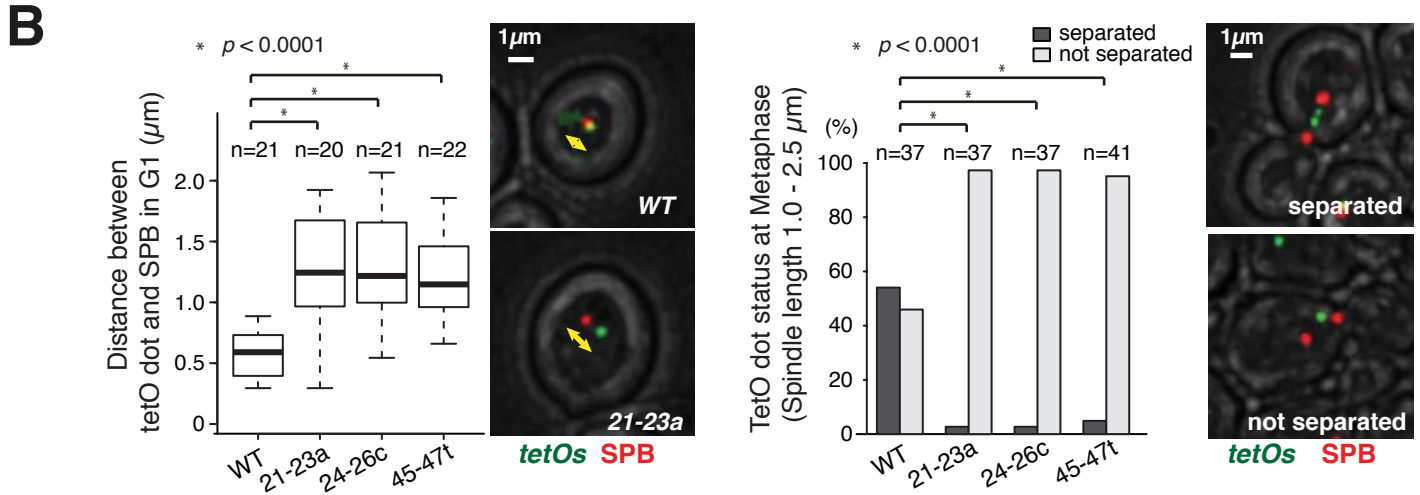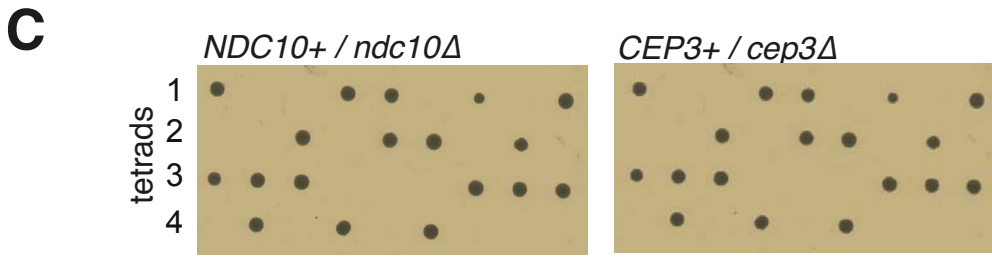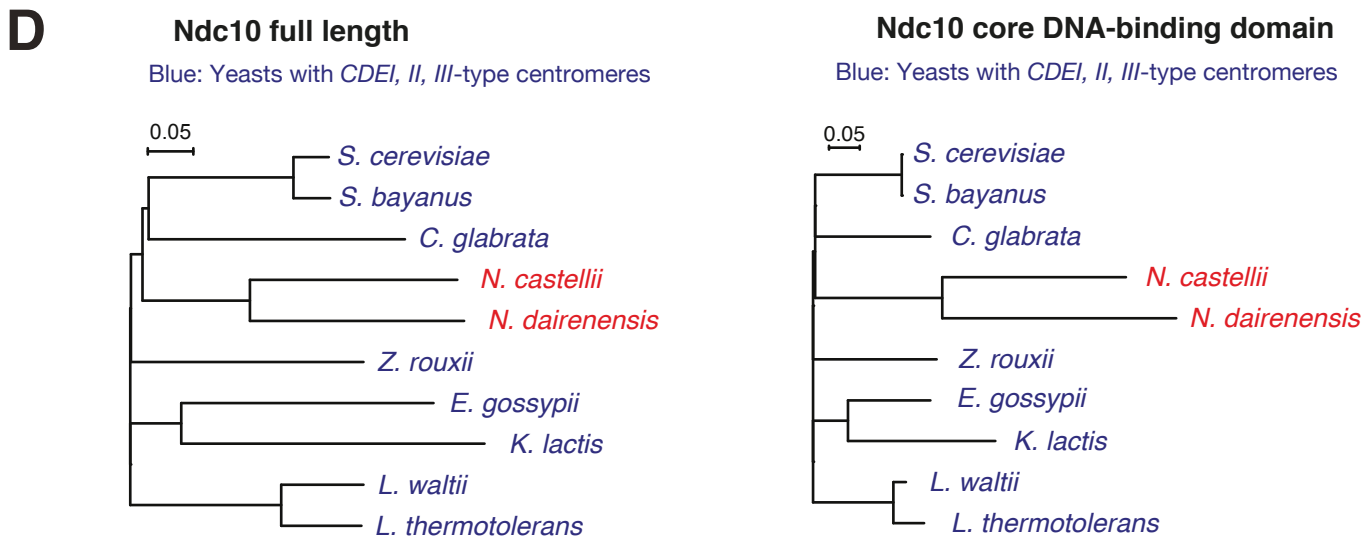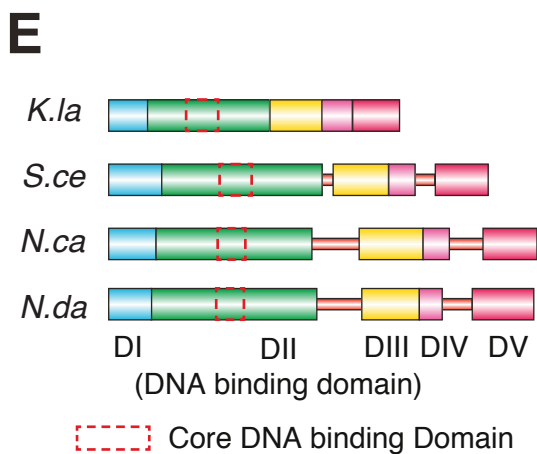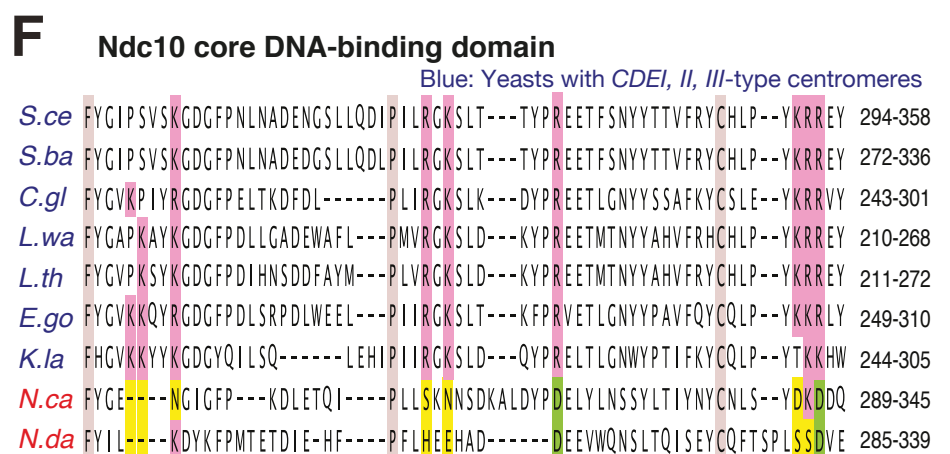

### Figure S3. Supplemental Figures associated with Figure 4

**(A) Chromosome 10 is shortened, which is detected by ProbeL and ProbeR, after insertion of wild-type *NcCEN1* onto this chromosome.** *NcCEN1* wild-type and its mutants (21–23a, 24–26c and 45–47t; see Figure 3C) were inserted on chromosome 10 in *N. castellii* cells (Figure 4A). Karyotypes of individual clones were analyzed by pulsed field gel electrophoresis (PFGE), followed by southern blots with ProbeL and ProbeR (Figure 4A). As shown in these tables, we detect shortening (i.e. breakage) of chromosome 10 with both ProbeL and ProbeR, in most clones (10/13 and 13/13, respectively), after wild-type *NcCEN1* was inserted on an arm of chromosome 10. In these clones, the sizes of two chromosome 10 fragments, each detected by ProbeL and ProbeR, are negatively correlated; i.e. if one is large, then the other is small. The total size of the two fragments corresponds approximately to the length of the whole chromosome 10 (Figure 4A). This is consistent with chromosome 10 being broken somewhere between *NcCEN10* and the inserted *NcCEN1*. It is known that, after a dicentric chromosome is broken in *S. cerevisiae* cells, telomeres are often generated *de novo* at broken ends, allowing stable transmission of broken chromosome fragments [S13]. On the other hand, in 3/13 clones the chromosome band, hybridized by ProbeL, did not show appreciable size changes from the original chromosome 10 (e.g. the first and second clones from the left, with wild-type *NcCEN1* in Figure 4A). Given that all these clones carried smallest chromosome 10 fragments detected by ProbeR, it is possible that chromosome 10 fragments, detected by ProbeL, are shortened modestly, but their size change could not be detected by PFGE. Alternatively, a more complex chromosome rearrangement may have been involved; for example, a small region containing *NcCEN1* may have been deleted while a small chromosome fragment with *NcCEN1* is also present in the same cell (similar to T10/3 cell in Fig 3B of [S13]). After insertion of mutant *NcCEN1*, chromosome 10 did not show size changes when hybridized by ProbeL or ProbeR. In the table in Figure 4A, chromosome 10 breakage is scored when its shortening was detected by ProbeL, ProbeR or both.

**(B) Analyses of *tetO*s localization after *NcCEN1* wild-type and its mutants were inserted on chromosome 10.** *NcCEN1* wild-type (WT; T11632), 21–23a (see Figure 3C; T11842), 24–26c (T11843) and 45–47t (T11844), each marked with *tetOx112*, were inserted at 214 kb right of *NcCEN10* on chromosome 10 in *SPC42-4xmCherry TetR-GFP* cells, as in Figure 2B. Left: distance between the SPB and the *tetO* dot in G1 phase (unbudded cells). Right: frequency of separation and non-separation of the *tetO* dot in metaphase (cells with two SPBs 1.0–2.5  $\mu$ m apart).

**(C) *Ndc10* and *Cep3* are essential genes in *N.castellii*.** T11322 (*NDC10*<sup>+</sup> / *ndc10* $\Delta$ ) and T11487 (*CEP3*<sup>+</sup> / *cep3* $\Delta$ ) diploids were sporulated, tetrads were dissected, and colonies were formed. Each column represents each group of tetrads. *ndc10* $\Delta$  and *cep3* $\Delta$  were made by replacing *NDC10* and *CEP3* coding regions with *HPH* and *NAT* marker genes, respectively. None of growing colonies contained these marker genes. The results indicate that both *NDC10* and *CEP3* are essential genes for cell viability.

**(D) Rapid change of the *Ndc10* core DNA-binding domain during evolution of *N. castellii* and *N. dairenensis*.** Phylogenetic trees were constructed from (left) full-length *Ndc10* proteins after masking highly variable regions with Gblocks (452 amino acid sites), and (right) the core DNA binding domain (red rectangles in E and 43 amino acid residues in F). Trees were constrained to have the reference species topology (Figure 1A). Branch lengths were estimated by the least-squares method using uncorrected differences. Short negative-length branches were collapsed to

zero length. Scale bars indicate 5% divergence. Comparison of the two phylogenetic trees suggests that the core DNA binding domain of Ndc10 showed more rapid change than other parts of Ndc10, during evolution of *N. castellii* and *N. dairenensis*. Note that Cse4 also binds the point centromeres of budding yeasts [S14], and it is interesting to investigate how DNA-binding domains of Cse4 changed during the evolution of budding yeast species. However, there are several different models about the organization of Cse4-containing nucleosome [S15], and DNA-binding domains or residues of Cse4 have not yet been determined with agreement. Nonetheless, some domains of Cse4 showed more rapid changes during the evolution of *N. castellii*, compared with other budding yeasts [S16].

**(E) Diagram of the Ndc10 domains of *K. lactis*, *S. cerevisiae*, *N. castellii* and *N. dairenensis*.** Colored boxes represent conserved domains, as reported in [S17]. Red rectangles show the Ndc10 core DNA binding domains (analyzed in D).

**(F) Most of DNA-binding residues of Ndc10 in yeasts with the CDEI, II, III-type centromere are not conserved in *N. castellii* and *N. dairenensis*.** Ndc10 is a component of the CBF3 complex, which binds directly the consensus DNA sequence of point centromeres ([S17-20] and references therein). Amino acid sequences of the Ndc10 core DNA-binding domain (the region shown in E) are aligned among several budding yeast species. Within this domain, nine basic amino acid residues (lysines and arginines) have been identified to make direct contact with DNA [S17, S20] (pink shading). Six out of the nine residues are conserved (including an exchange between lysine and arginine) among all budding yeasts carrying *CDE I, II* and *III*, whereas the three other residues are conserved in some of them. By contrast, the majority of them are not conserved in *N. castellii* or *N. dairenensis* (yellow shading); in fact, only one of the nine basic amino acid residues is conserved in *N. castellii* and *N. dairenensis* (pink shading). Notably, two of the nine lysine and arginine were replaced with aspartate (D), in both *N. castellii* and *N. dairenensis* (green shading). Other conserved amino acid residues among budding yeasts are highlighted in brown. The low level of conservation of Ndc10 DNA-binding residues in *N. castellii* and *N. dairenensis* may reflect adaptation to the new type of centromere *CDEs* evolved in these budding yeast species.

Given the above results about CBF3 components, we addressed if *N. castellii* Ndc10 or CBF3 is sufficient to recognize the *N. castellii* centromere, by explanting an *N. castellii* *CEN* into *S. cerevisiae* cells. We integrated *NcCEN1* into an *S. cerevisiae* chromosome arm, visualized it with *tetOs* and TetR-GFP, and expressed the following proteins from the *GALS* promoter (and also from the *S. cerevisiae* *NDC10* promoter for Ndc10 proteins); 1) *N. castellii* Ndc10, 2) Ndc10 chimera (*S. cerevisiae* Ndc10 with its DNA binding domain replaced with that of *N. castellii* Ndc10) and 3) all four *N. castellii* CBF3 components (i.e. Ndc10, Cep3, Ctf13 and Skp1). However, the *N. castellii* *CEN* was not pulled to a spindle pole in *S. cerevisiae* cells, suggesting that other factors are required to recognize *N. castellii* *CEN* in *S. cerevisiae* cells.

**A**

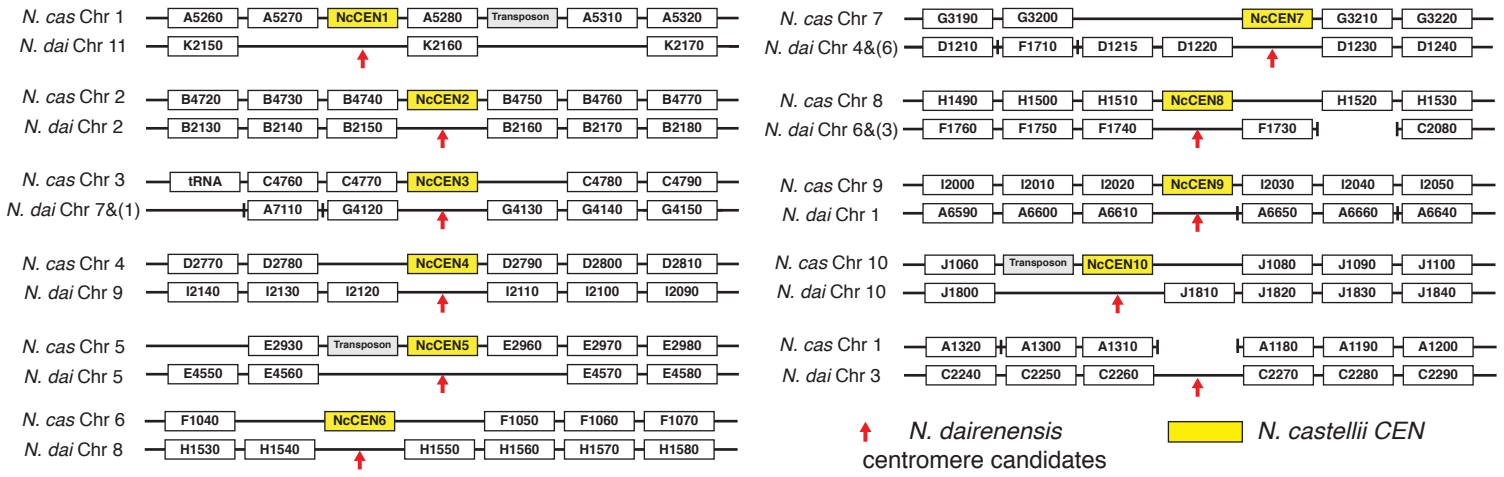

**B**

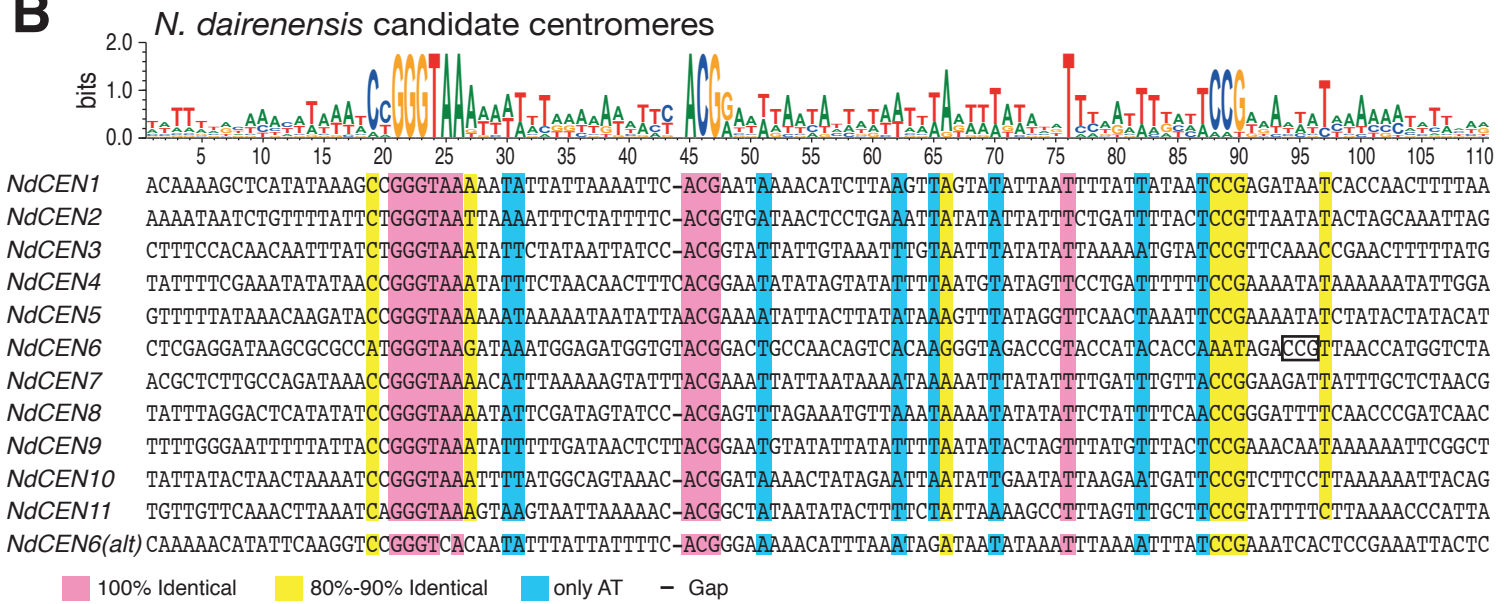

**C**

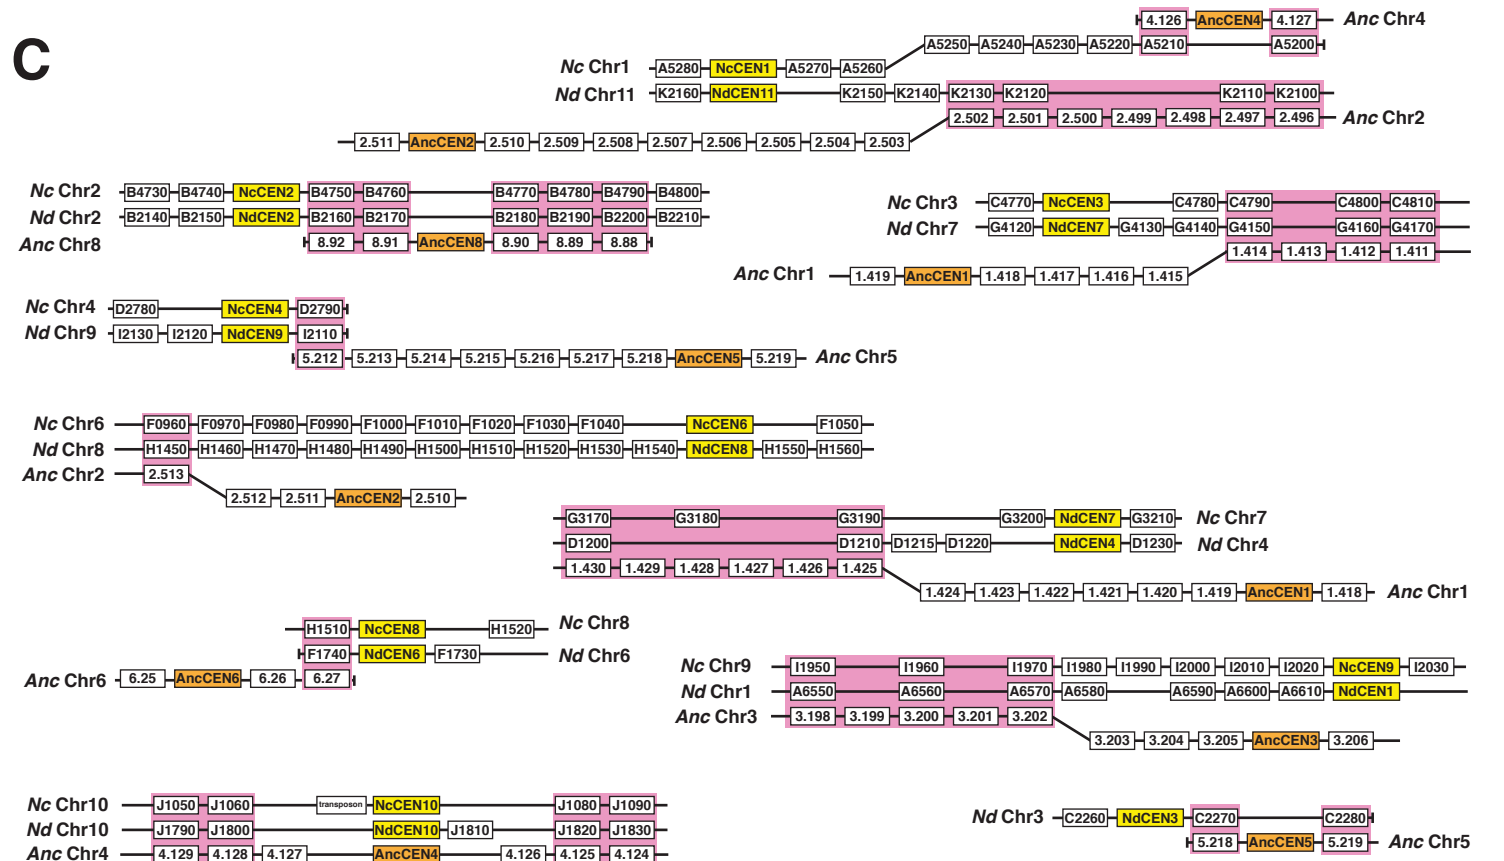

## Figure S4. Supplemental figures associated with Figure 4

**(A) Gene orders in *N. castellii* and *N. dairenensis*, aligned around *N. castellii* CENs.** Yellow boxes represent *N. castellii* CENs. Red arrows indicate positions of candidate *N. dairenensis* centromeres (*NdCEN*, shown in **B**) with consensus DNA sequence (shown in Figure 4D). *N. castellii* has 10 chromosomes and *N. dairenensis* has 11. Chromosome 3 of *N. dairenensis* does not have an intergenic region corresponding to a *N. castellii* CEN, based on synteny. Nevertheless we identified a candidate centromere (*NdCEN3* in **B**) on chromosome 3, as shown in this figure.

**(B) Identified candidate centromere sequences (*NdCEN1–11*) on *N. dairenensis* chromosomes.** These candidate centromeres (*NdCENs*) were identified at the *N. dairenensis* chromosome loci shown in **A** (red arrows). Logos of nucleotides at the top graphically represent their frequency at individual positions, among the *NdCEN1–11* of *N. dairenensis*. Nucleotide positions, highlighted in pink and yellow, represent those identical among 100% and 80–90% *NdCENs*, respectively. Blue shows positions only with A and T. Consensus DNA elements, *NaCDEI*, *II* and *III*, are shown in Figure 4D (*N. dairenensis*). For *NdCEN6*, we identified two possible matches to the consensus in the same intergenic region: one (*NdCEN6*) that does not contain the conserved CCG at positions 88–90 but has CCG at positions 94–96 (in box), and another (*NdCEN6 [alt]*) that has GGGTCA instead of the conserved GGGTAA at positions 21–26. *NdCEN6 (alt)* is not included in making the sequence logo at top. *NdCEN11* is found between K2160 and K2170, but we interpret that it is at the position corresponding to *NcCEN1* (as shown in **A**) because K2160 is inverted. Note that we identified the candidate centromeres *NdCEN1–11* in *N. dairenensis*, as follows: When we used MEME to search for a consensus sequence in the *N. dairenensis* intergenic regions shown in **A** (red arrows, excluding chromosome 3), we initially found a highly conserved sequence of 251 bp that appeared to be the long terminal repeat (LTR) of a Ty-like transposable element (e.g. LTR between D1220 and D1230 on chromosome 4: European Nucleotide Archive HE580270.1, bases 291920–292170). In *N. dairenensis* there is a cluster of LTRs on each chromosome (with two clusters on chromosomes 7 and 9), and ten of these clusters map at positions syntenic with *N. castellii* centromeres, which suggested that the LTR is from a retroelement with a preference for integration at centromeres. This LTR has no counterpart in *N. castellii*. On the ‘extra’ *N. dairenensis* chromosome (chromosome 3), which contains no region orthologous to an *N. castellii* centromere, a cluster of LTRs indicated a likely centromere location. After masking LTRs and Ty fragments from these 11 candidate *N. dairenensis* intergenic regions, we identified consensus DNA elements (*CDEs*) that are very similar to *CDEs* found at *N. castellii* CENs, as shown in this figure and Figure 4D.

Comparison of *CDEs* between *N. castellii* and *N. dairenensis* not only indicated *NaCDEI* and *II* as conserved *CDEs*, but also highlighted a third conserved *CDE* (CC at positions 88–89), which is named *NaCDEIII* (Figure 4D). ‘CCG’ in *NaCDEIII* is conserved in most candidate centromeres (10 or 11 [depending on whether including *NdCEN6*] out of 11) of *N. dairenensis* (Figure S4B). However, ‘CCG’ in *NaCDEIII* is conserved only 5 out of 10 *N. castellii* centromeres, while ‘CC’ in *NaCDEIII* is conserved 8 out of 10 (Figure 3A). Nonetheless, ‘CCG’ or ‘CC’ may still be important for *NcCEN* function when present. To test this, we mutated ‘CC’ (replaced by ‘TT’) in *NaCDEIII* of *NcCEN1*. However, this mutation reduced the colony number only modestly ( $64.5 \pm 0.9$  % of wild-type *NcCEN1*) in the assay shown in Figure 3B and D. Thus, although the ‘CC’ in *NaCDEIII* is evolutionarily conserved, it is not essential for *N. castellii* centromere function.

**(C) Most *N. castellii* centromeres and *N. dairenensis* candidate centromeres show direct or indirect synteny relationship to the vicinity of ancestral centromeres.** *NcCENs* and *NdCENs* are shown in yellow boxes, while *AncCENs* are shown in orange boxes. Pink shading indicates that *Anc* genes and *Nc/Nd* genes (*Anc*: ancestor, *Nc*: *N. castellii*, *Nd*: *N. dairenensis*) in alignment are orthologous (aligned with the same gene orientation). *Nc* and *Nd* genes in alignment are also orthologous. Vertical tick bars show rearrangement between the *Anc* genome and *Nc/Nd* genome. Oblique lines connecting genes (boxes) show rearrangement between two genomes in comparison.

Detailed comparison to the gene order in the pre-WGD ancestor inferred by Gordon et al [S2] shows that most of *N. castellii* centromeres and *N. dairenensis* candidate centromeres show direct or indirect synteny relationship to the vicinity of ancestral centromeres as shown in this figure: *NcCEN10* and *NdCEN10* are precisely at an ancestral centromere location. *NcCEN2*, *NdCEN2* and *NdCEN3* are near, but not exactly at, an ancestral centromere position. Seven *NcCENs* (*NcCEN1*, 3, 4, 6, 7, 8, 9) and seven *NdCENs* (*NdCEN1*, 4, 6, 7, 8, 9, 11) have an indirect synteny relationship to the vicinity of ancestral centromeres; i.e. at least one gene, locating within 10 genes from the *NcCEN* or *NdCEN*, has an ancestral ortholog (pink shading) within 10 genes from an *AncCEN*. Only one (*NcCEN5*, not shown) is at a location that is completely unrelated to ancestral centromere locations. This result suggests that most of the ancestors of *NcCENs* and *NdCENs* may have been near *AncCEN* sites at some time in the past, but subsequent rearrangements in the *N. castellii* and *N. dairenensis* genome have now moved them further apart. By computer simulation, we estimate that the association between *NcCENs* and the neighbourhoods of ancestral centromeres is statistically significant ( $P < 10^{-7}$ , see Experimental procedures).

If the ancestors of *NcCENs* and *NdCENs* were near *AncCEN* sites at some time in the past, what is the reason for it? One possible model explaining this is as follows: The genome of a *Naumovozya* species, prior to the divergence between *N. castellii* and *N. dairenensis*, had standard point centromeres but somehow acquired a new sequence (*NaCDEI*, *II*, *III*). At some point during evolution (before the new centromere superseded the standard point centromere), both standard point centromeres and new centromeres were functional. Because dicentric chromosomes tend to break after being caught by microtubules from the opposite spindle poles [S21], evolutionary pressure may have favoured cells with rearrangements in which the new sequence was located close to an old centromere so that two centromeres were unlikely to be caught by the opposite spindle poles. In fact, it is known that a dicentric chromosome with a shorter interval between two centromeres is more stably maintained in budding yeast [S22].



*N. castellii* genome

Average AT content

63.24 %

| CEN Block      | 1-19 | 27-44 | 53-87 | 90-110 |
|----------------|------|-------|-------|--------|
| <i>NcCEN1</i>  | 79%  | 83%   | 86%   | 90%    |
| <i>NcCEN2</i>  | 89%  | 94%   | 83%   | 90%    |
| <i>NcCEN3</i>  | 89%  | 78%   | 89%   | 86%    |
| <i>NcCEN4</i>  | 84%  | 83%   | 83%   | 86%    |
| <i>NcCEN5</i>  | 68%  | 89%   | 83%   | 71%    |
| <i>NcCEN6</i>  | 63%  | 94%   | 86%   | 67%    |
| <i>NcCEN7</i>  | 68%  | 89%   | 91%   | 76%    |
| <i>NcCEN8</i>  | 84%  | 83%   | 80%   | 76%    |
| <i>NcCEN9</i>  | 79%  | 89%   | 83%   | 81%    |
| <i>NcCEN10</i> | 68%  | 83%   | 97%   | 81%    |

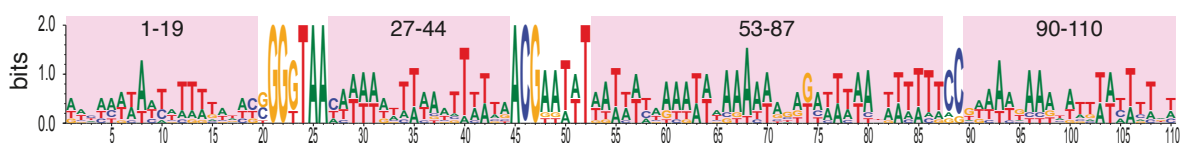

**Table S1. AT contents at *N. castellii* CENs.**

Sequences of *N. castellii* CEN sequences (110 bp; see [Figure 3A](#)) were divided by three consensus sequences (*NcCDEI* [position 20-26], *NcCDEII* [position 45-52] and *CC-rich* [position 88-89]) and the percentage of AT content was analyzed in four blocks (Block 1-19, 27-44, 53-87 and 90-110). DNA sequences within these blocks are not conserved among chromosomes, but percentage of AT is higher in all blocks than the average percentage of AT on the genome (63.24% [S3]). This result is reminiscent of *CDEII* in other budding yeasts, which shows a high AT content (>79% [S19, S23, S24]).

Table S2: Yeast strains used in this study

| Strain | Genotype                                                                                                                                                                                                | Parental strain      | Plasmid used for construction | Through tetrad dissection | Reference Figures    |
|--------|---------------------------------------------------------------------------------------------------------------------------------------------------------------------------------------------------------|----------------------|-------------------------------|---------------------------|----------------------|
| Y235   | MATa/MATa ura3-1/ura3-1                                                                                                                                                                                 | <i>N. castellii</i>  | CBS4310                       |                           | [S25] [S30]          |
| Y320   | MATa ura3-1 ho                                                                                                                                                                                          | <i>N. castellii</i>  | CBS4310                       |                           | [S25] [S30]          |
| T9377  | MATa CSE4-6xHA::kanMX4 ura3-1 ho                                                                                                                                                                        | <i>N. castellii</i>  | Y320 pT1729                   |                           | Fig S1B, S1C         |
| T9326  | MATa NDC80-6xHA::ScURA3 ho                                                                                                                                                                              | <i>N. castellii</i>  | Y320 pT1710                   |                           | Fig 1D, S1A          |
| T9326  | MATa NDC10-6xHA::ScURA3 ho                                                                                                                                                                              | <i>N. castellii</i>  | Y320 pT1709                   |                           | Fig 1D, S1A          |
| T11322 | MATa/MATa NDC10/ndc10Δ::hphNT1 ura3-1/ura3-1                                                                                                                                                            | <i>N. castellii</i>  | Y235 pT2203                   |                           | Fig S3C              |
| T11420 | MATa dcr1Δ::hphNT1 hoΔ::natNT2::AmpR ura3-1                                                                                                                                                             | <i>N. castellii</i>  | Y235 pT2205 pT2331            | YES (see diagram below)   | Fig S2E, S2F         |
| T11421 | MATa hoΔ::natNT2::AmpR ura3-1                                                                                                                                                                           | <i>N. castellii</i>  | Y235 pT2205 pT2331            | YES (see diagram below)   | Fig 3, S2C, S2E, S2F |
| T11424 | MATa/MATa NDC10-3xFLAG::kanMX4/NDC10-3xFLAG::kanMX4 ura3-1/ura3-1                                                                                                                                       | <i>N. castellii</i>  | Y235 pT2330                   | YES (see diagram below)   | diagram below        |
| T11450 | MATa/MATa CEP3-3xFLAG::kanMX4/CEP3-3xFLAG::kanMX4 ura3-1/ura3-1                                                                                                                                         | <i>N. castellii</i>  | Y235 pT2341                   | YES (see diagram below)   | Fig S1B, S1C         |
| T11459 | MATa/MATa ago1Δ/ago1Δ ura3-1/ura3-1                                                                                                                                                                     | <i>N. castellii</i>  | Y235 pT2204                   | YES (see diagram below)   | Fig S2E              |
| T11466 | MATa intergenic region(J1080-J1090 next to CEN10)::tetOx112::natNT2 ura3::TetR-GFP::NcURA3 SPC42-4xmCherry::kanMX4 ho                                                                                   | <i>N. castellii</i>  | Y320 pT2198 pT2379 pT2367     |                           | Fig 2                |
| T11467 | MATa intergenic region(J2080-J2090)::tetOx112::natNT2 ura3::TetR-GFP::NcUAR3 SPC42-4xmCherry::kanMX4 ho                                                                                                 | <i>N. castellii</i>  | Y320 pT2198 pT2379 pT2369     |                           | Fig 2                |
| T11487 | MATa/MATa CEP3/cep3Δ::natNT2 ura3-1/ura3-1                                                                                                                                                              | <i>N. castellii</i>  | Y235 pT2386                   |                           | Fig S3C              |
| T11500 | MATa intergenic region(I0780-I0790)::tetOx112::natNT2 ura3::TetR-GFP::NcUAR3 SPC42-4xmCherry::kanMX4 ho                                                                                                 | <i>N. castellii</i>  | Y320 pT2198 pT2379 pT2443     |                           | Fig 2                |
| T11501 | MATa intergenic region(I2020-I2030 at CEN9)::tetOx112::natNT2 ura3::TetR-GFP::NcUAR3 SPC42-4xmCherry::kanMX4 ho                                                                                         | <i>N. castellii</i>  | Y320 pT2198 pT2379 pT2442     |                           | Fig 2                |
| T11584 | MATa/MATa CEP3/CEP3-3xGFP::hphNT1 SPC42/SPC42-4xmCherry::kanMX4 ura3-1/ura3-1                                                                                                                           | <i>N. castellii</i>  | Y235 pT2379 pT2482            |                           | Fig 1C               |
| T11586 | MATa/MATa NDC80/NDC80-3xGFP::hphNT1 SPC42/SPC42-4xmCherry::kanMX4 ura3-1/ura3-1                                                                                                                         | <i>N. castellii</i>  | Y235 pT2379 pT2484            |                           | Fig 1C               |
| T11587 | MATa/MATa NDC10/NDC10-3xGFP::hphNT1 SPC42/SPC42-4xmCherry::kanMX4 ura3-1/ura3-1                                                                                                                         | <i>N. castellii</i>  | Y235 pT2379 pT2485            |                           | Fig 1C               |
| T11605 | MATa hoΔ::NcURA3                                                                                                                                                                                        | <i>N. castellii</i>  | Y235 pT2509                   | YES (see diagram below)   | Fig 4A, S3A          |
| T11632 | MATa/MATa intergenic region(J2080-J2090)::CEN1 WT (1173bp)::tetOx112::natNT2(1one allele) intergenic region(I0780-I0790)::TetR-GFP::hphNT1(1one allele) SPC42/SPC42-4xmCherry::kanMX4 ura3-1/ura3-1     | <i>N. castellii</i>  | Y235 pT2459 pT2379 pT2539     |                           | Fig 4B, S3B          |
| T11842 | MATa/MATa intergenic region(J2080-J2090)::CEN1 21-23a (1173bp)::tetOx112::natNT2(1one allele) intergenic region(I0780-I0790)::TetR-GFP::hphNT1(1one allele) SPC42/SPC42-4xmCherry::kanMX4 ura3-1/ura3-1 | <i>N. castellii</i>  | Y235 pT2459 pT2379 pT2603     |                           | Fig 4B, S3B          |
| T11843 | MATa/MATa intergenic region(J2080-J2090)::CEN1 24-26c (1173bp)::tetOx112::natNT2(1one allele) intergenic region(I0780-I0790)::TetR-GFP::hphNT1(1one allele) SPC42/SPC42-4xmCherry::kanMX4 ura3-1/ura3-1 | <i>N. castellii</i>  | Y235 pT2459 pT2379 pT2604     |                           | Fig 4B, S3B          |
| T11844 | MATa/MATa intergenic region(J2080-J2090)::CEN1 45-47i (1173bp)::tetOx112::natNT2(1one allele) intergenic region(I0780-I0790)::TetR-GFP::hphNT1(1one allele) SPC42/SPC42-4xmCherry::kanMX4 ura3-1/ura3-1 | <i>N. castellii</i>  | Y235 pT2459 pT2379 pT2606     |                           | Fig 4B, S3B          |
| T11845 | MATa/MATa intergenic region(J2080-J2090)::CEN1 WT (1173bp)::natNT2(1one allele) NDC10-3xFLAG::kanMX4/NDC10-3xFLAG::kanMX4 ura3-1/ura3-1                                                                 | <i>N. castellii</i>  | T11424 pT2503                 |                           | Fig 4C               |
| T11846 | MATa/MATa intergenic region(J2080-J2090)::CEN1 WT (1173bp)::natNT2(1one allele) NDC10-3xFLAG::kanMX4/NDC10-3xFLAG::kanMX4 ura3-1/ura3-1                                                                 | <i>N. castellii</i>  | T11424 pT2599                 |                           | Fig 4C               |
| T11847 | MATa/MATa intergenic region(J2080-J2090)::CEN1 WT (1173bp)::natNT2(1one allele) CEP3-3xFLAG::kanMX4/CEP3-3xFLAG::kanMX4 ura3-1/ura3-1                                                                   | <i>N. castellii</i>  | T11450 pT2503                 |                           | Fig 4C               |
| T11848 | MATa/MATa intergenic region(J2080-J2090)::CEN1 24-26c (1173bp)::natNT2(1one allele) CEP3-3xFLAG::kanMX4/CEP3-3xFLAG::kanMX4 ura3-1/ura3-1                                                               | <i>N. castellii</i>  | T11450 pT2599                 |                           | Fig 4C               |
| T11520 | MATa NDC10-yEGFP::hphNT1 SPC110-mCherry::kanMX6 ho                                                                                                                                                      | <i>S. cerevisiae</i> | W303                          |                           | Fig 1C               |
| T11521 | MATa NDC80-yEGFP::hphNT1 SPC110-mCherry::kanMX6 ho                                                                                                                                                      | <i>S. cerevisiae</i> | W303                          |                           | Fig 1C               |
| T11522 | MATa CEP3-yEGFP::hphNT1 SPC110-mCherry::kanMX6 ho                                                                                                                                                       | <i>S. cerevisiae</i> | W303                          |                           | Fig 1C               |

Table S2 continued (diagram)

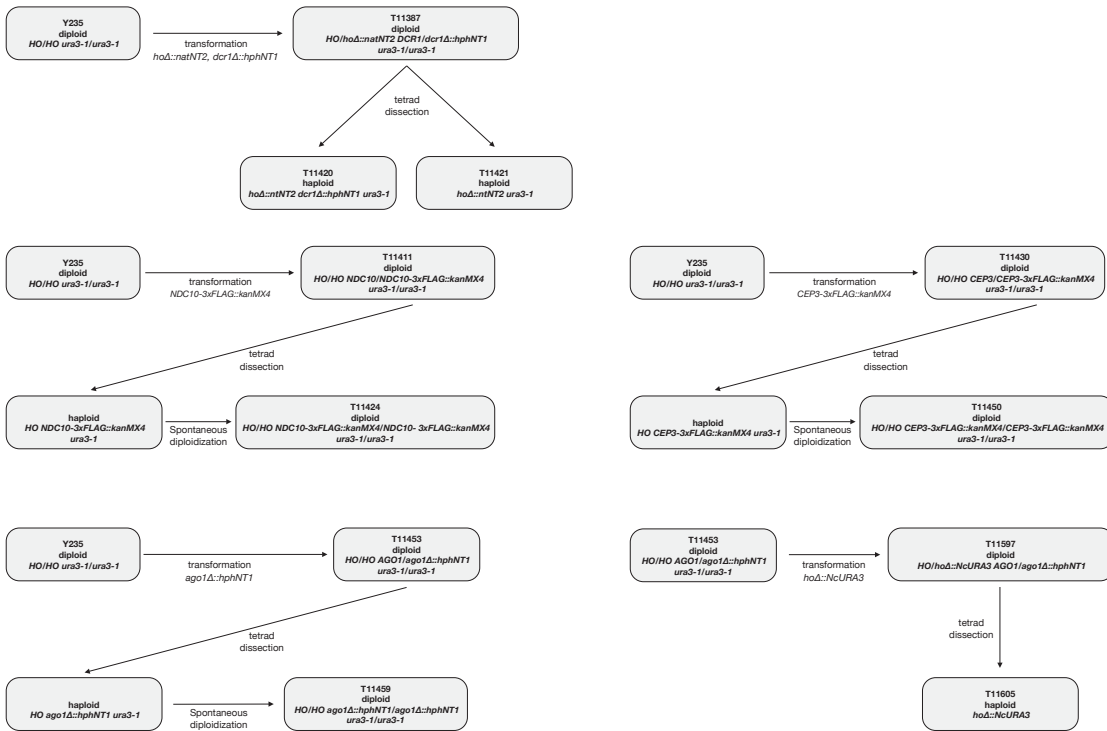

**Table S3: Plasmids used for strain construction**

| Plasmid | Description                                                            | Integration method (see examples below) | Restriction enzymes to cut for integration |
|---------|------------------------------------------------------------------------|-----------------------------------------|--------------------------------------------|
| pT1709  | <i>NDC10</i> C-terminus-6xHA::ScURA3                                   | ends-in                                 | <i>SwaI</i>                                |
| pT1710  | <i>NDC80</i> C-terminus-6xHA::ScURA3                                   | ends-in                                 | <i>SpeI</i>                                |
| pT1729  | <i>CSE4</i> C-terminus-6xHA::kanMX4::CSE4 3' UTR                       | ends-out (replacement)                  | (PCR amplification)                        |
| pT2198  | <i>NcURA3</i> ::TetR-GFP::NcURA3                                       | ends-in                                 | <i>NheI</i>                                |
| pT2203  | <i>NDC10</i> 5' UTR::hphNT1::NDC10 3' UTR ( <i>ndc10Δ</i> )            | ends-out (replacement)                  | <i>BstBI/BamHI</i>                         |
| pT2204  | <i>AGO1</i> 5' UTR::hphNT1::AGO1 3' UTR ( <i>ago1Δ</i> )               | ends-out (replacement)                  | <i>Sall/EcoRV</i>                          |
| pT2205  | <i>DCR1</i> 5' UTR::hphNT1::DCR1 3' UTR ( <i>dcr1Δ</i> )               | ends-out (replacement)                  | <i>MfeI/BglII</i>                          |
| pT2330  | <i>NDC10</i> C-terminus-3xFLAG::kanMX4::NDC10 3' UTR                   | ends-out (insertion)                    | <i>EcoRV/PvuII</i>                         |
| pT2331  | <i>HO</i> 5' UTR::natNT2::AmpR::HO 3' UTR ( <i>hoΔ</i> )               | ends-out (replacement)                  | <i>Eco47III</i>                            |
| pT2341  | <i>CEP3</i> C-terminus-3xFLAG::kanMX4::CEP3 3' UTR                     | ends-out (insertion)                    | <i>PvuII/EcoRV</i>                         |
| pT2367  | intergenic region(next to <i>CEN10</i> )::tetOx112::natNT2             | ends-out (insertion)                    | <i>Eco47III</i>                            |
| pT2369  | intergenic region(J2080-J2090)::tetOx112::natNT2                       | ends-out (insertion)                    | <i>Eco47III</i>                            |
| pT2379  | <i>SPC42</i> C-terminus-4xmCherry::kanMX4::SPC42 3' UTR                | ends-out (insertion)                    | <i>SpeI/HpaI</i>                           |
| pT2386  | <i>CEP3</i> 5' UTR::natNT2::AmpR::CEP3 3' UTR ( <i>cep3Δ</i> )         | ends-out (replacement)                  | <i>Eco47III</i>                            |
| pT2442  | intergenic region(at <i>CEN9</i> )::tetOx112::natNT2                   | ends-out (insertion)                    | <i>Eco47III</i>                            |
| pT2443  | intergenic region(I0780-I0790)::tetOx112::natNT2                       | ends-out (insertion)                    | <i>Eco47III</i>                            |
| pT2459  | intergenic region(I0780-I0790)::TetR-GFP::hphNT1                       | ends-out (insertion)                    | <i>Eco47III</i>                            |
| pT2482  | <i>CEP3</i> C-terminus-3xGFP::hphNT1::CEP3 3' UTR                      | ends-out (insertion)                    | <i>EcoRV/PvuII</i>                         |
| pT2484  | <i>NDC80</i> C-terminus-3xGFP::hphNT1::NDC80 3' UTR                    | ends-out (insertion)                    | <i>PvuII</i>                               |
| pT2485  | <i>NDC10</i> C-terminus-3xGFP::hphNT1::NDC10 3' UTR                    | ends-out (insertion)                    | <i>EcoRV/PvuII</i>                         |
| pT2503  | intergenic region(J2080-J2090)::CEN1 1173bp WT::natNT2                 | ends-out (insertion)                    | <i>Eco47III</i>                            |
| pT2509  | <i>HO</i> 5' UTR::NcURA3::AmpR::HO 3' UTR ( <i>hoΔ</i> )               | ends-out (replacement)                  | <i>Eco47III</i>                            |
| pT2539  | intergenic region(J2080-J2090)::CEN1 1173bp WT::tetOx112::natNT2       | ends-out (insertion)                    | <i>Eco47III</i>                            |
| pT2598  | intergenic region(J2080-J2090)::CEN1 1173bp (21-23a)::natNT2           | ends-out (insertion)                    | <i>Eco47III</i>                            |
| pT2599  | intergenic region(J2080-J2090)::CEN1 1173bp (24-26c)::natNT2           | ends-out (insertion)                    | <i>Eco47III</i>                            |
| pT2601  | intergenic region(J2080-J2090)::CEN1 1173bp (45-47t)::natNT2           | ends-out (insertion)                    | <i>Eco47III</i>                            |
| pT2603  | intergenic region(J2080-J2090)::CEN1 1173bp (21-23a)::tetOx112::natNT2 | ends-out (insertion)                    | <i>Eco47III</i>                            |
| pT2604  | intergenic region(J2080-J2090)::CEN1 1173bp (24-26c)::tetOx112::natNT2 | ends-out (insertion)                    | <i>Eco47III</i>                            |
| pT2606  | intergenic region(J2080-J2090)::CEN1 1173bp (45-47t)::tetOx112::natNT2 | ends-out (insertion)                    | <i>Eco47III</i>                            |

pT2503, pT2598, pT2599 and pT2601 were used in Figure 4A

**Ends-out (Replacement) [Example]**

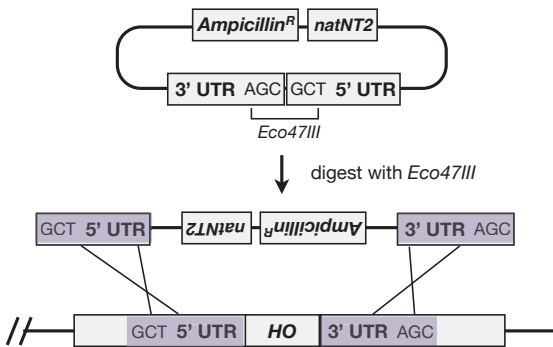

**Ends-out (Insertion) [Example]**

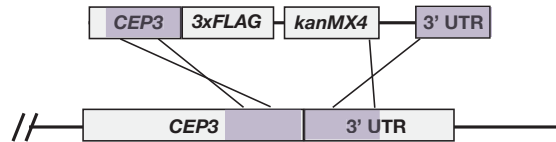

**Ends-in [Example]**

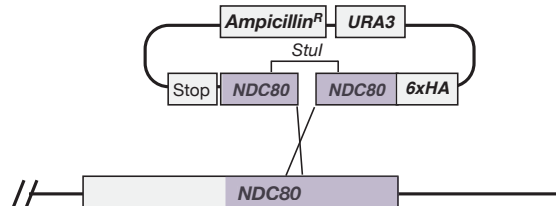

**Table S4: Plasmids used for colony formation assays**

| <b>Plasmid</b> | <b>Description</b>                                                      | <b>Reference Figures</b> |
|----------------|-------------------------------------------------------------------------|--------------------------|
| <b>pRS316</b>  | <i>ScURA3, ScCEN6 &amp; ScARSH4</i>                                     | [S41]                    |
| <b>pRS306</b>  | <i>ScURA3</i>                                                           | [S41]                    |
| <b>pT2279</b>  | <i>NcCEN1 1173 bp on pRS306</i>                                         | Fig 3B, 3D, 3E, S2E, S2F |
| <b>pT2315</b>  | <i>NcCEN1 110 bp on pRS306</i>                                          | Fig 3B                   |
| <b>pT2314</b>  | <i>NcCEN1 110R on pRS306</i>                                            | Fig 3B                   |
| <b>pT2312</b>  | <i>NcCEN1 110L on pRS306</i>                                            | Fig 3B                   |
| <b>pT2302</b>  | <i>NcCEN1 70 bp on pRS306</i>                                           | Fig 3B                   |
| <b>pT2281</b>  | <i>NcCEN10 589 bp on pRS306</i>                                         | Fig 3B                   |
| <b>pT2289</b>  | <i>NcCEN10 252 bp on pRS306</i>                                         | Fig 3B                   |
| <b>pT2325</b>  | <i>NcCEN10 110 bp on pRS306</i>                                         | Fig 3B                   |
| <b>pT2304</b>  | <i>NcCEN10 70 bp on pRS306</i>                                          | Fig 3B                   |
| <b>pT2290</b>  | <i>NcCEN10 off center on pRS306</i>                                     | Fig 3B                   |
| <b>pT2670</b>  | <i>NcCEN1 1173 bp 32-34c on pRS306</i>                                  | Fig 3D, 3E               |
| <b>pT2671</b>  | <i>NcCEN1 1173 bp 37-39g on pRS306</i>                                  | Fig 3D, 3E               |
| <b>pT2519</b>  | <i>NcCEN1 1173 bp 21-23a on pRS306</i>                                  | Fig 3D, 3E               |
| <b>pT2520</b>  | <i>NcCEN1 1173 bp 24-26c on pRS306</i>                                  | Fig 3D, 3E, S2E, S2F     |
| <b>pT2524</b>  | <i>NcCEN1 1173 bp 45-47t on pRS306</i>                                  | Fig 3D, 3E               |
| <b>pT2692</b>  | <i>intergenic region 1064 bp (A5960-5970) on pRS306</i>                 | Fig 3D, 3E               |
| <b>pT2240</b>  | <i>NcCEN4 842 bp on pRS306</i>                                          | Fig S2C                  |
| <b>pT2356</b>  | <i>NcCEN4 842 bp, intergenic region 1399 bp (B2740-B2750) on pRS306</i> | Fig S2C                  |
| <b>pT2247</b>  | <i>NcCEN4 842 bp, intergenic region 709 bp (B2750-B2760) on pRS306</i>  | Fig S2C                  |
| <b>pT2248</b>  | <i>NcCEN4 842 bp, intergenic region 1020 bp (B2760-B2770) on pRS306</i> | Fig S2C                  |
| <b>pT2249</b>  | <i>NcCEN4 842 bp, intergenic region 454 bp (B2770-B2780) on pRS306</i>  | Fig S2C                  |

*Sc*: *Saccharomyces cerevisiae*

*Nc*: *Naumovozyma castellii*

## Supplemental Experimental Procedures

### Yeast strain construction

*N. castellii* strains were constructed, based on Y235 (*MATa/MAT $\alpha$  ura3-1/ura3-1 HO/HO*) and Y320 (*MAT $\alpha$  ura3-1 ho*); all of them derive from CBS4310 [S25]. Table S2 shows the genotypes of *N. castellii* and *S. cerevisiae* strains, used in this study. The plasmids, used for construction of *N. castellii* strains, are listed in Table S3. To generate homozygous diploid strains (T11424, T11450 and T11459), relevant constructs (*NDC10-3xFLAG*, *CEP3-3xFLAG* and *ago1 $\Delta$* , respectively) were integrated into Y235, which was followed by sporulation, tetrad dissection and spontaneous diploidization. *S. cerevisiae* strains, used in Figure 1C, were constructed by a one-step PCR method for gene tagging, using yEGFP-HphNT1 (pYM25 [S26]) and mCherry-KanMX6 [S27] cassettes. In both *N. castellii* and *S. cerevisiae* strains, relevant genes were tagged at their C-terminus at their original loci, and the tagged genes were expressed from their original promoters, unless otherwise stated. *N. castellii* *CSE4* was tagged with 6x HA at the C-terminus and with 3x HA at an internal site (between residues 107 and 108, which corresponds to residues 81–82 of *S. cerevisiae* Cse4 [S28]); both versions gave similar results in ChIP-seq.

### Plasmid construction

The plasmids, used for construction of *N. castellii* strains, are listed in Table S3. Relevant 400–600 bp DNA fragments, derived from the *N. castellii* genome, were cloned into plasmids, which were integrated at target sites on the genome, using ends-in or ends-out methods [S29], as described in Table S3.

### Cell growth and transformation

Yeast cells were cultured at 25°C in YP medium containing 2% glucose (YPD). Transformations were performed as described previously [S29, S30] with some modifications: either 2  $\mu$ g of circular plasmid DNA, or 2–5  $\mu$ g of linear DNA was added to a mixture of 12.5  $\mu$ l of single-stranded DNA (2 mg/ml salmon sperm DNA, Sigma–Aldrich D1626), 120  $\mu$ l of 50% PEG 3350 (Sigma-Aldrich), 18  $\mu$ l of 1 M LiAc, and mixed with  $\sim 1.5 \times 10^8$  cells. After incubation at 30°C for 30 min, the mixtures were heat-shocked at 42°C for 20 min and then plated on selective media. Where antibiotics were subsequently used for selection, cells were incubated for 6 h at 25°C in YPD without antibiotics before being plated with antibiotics.

### ChIP-seq and ChIP-qPCR

The procedures were based on previously described methods [S31] with some modifications. Yeast cells were cultured in 200 ml YPD medium. For crosslinking, cells were incubated with 1% formaldehyde at 25°C for 20 min and then shifted to 4°C overnight. Cells were harvested and washed with 100 ml sterile water and then washed with 50 ml TBS buffer (20 mM TrisCl pH 7.4, 150 mM NaCl). Cell pellets were suspended in 600  $\mu$ l of lysis buffer (50 mM HEPES-KOH pH 7.5, 140 mM NaCl, 1 mM EDTA pH 8.0, 1% TritonX-100, 0.1% sodium deoxycholate and 2x protease inhibitor cocktail, cOmplete-Mini [Roche]) and frozen in liquid nitrogen. Frozen cells were then physically disrupted with a mortar and a pestle. Cell powders were resuspended in 600  $\mu$ l of lysis buffer, and sonicated with Bioruptor (Diagenode; 30 sec x 30 cycles with 30 sec intervals at high intensity), resulting in an average DNA fragment size of 200 bp. The lysates were clarified by centrifugation at 13,000 g for 15 min. Aliquots of 40  $\mu$ l of the lysate were used to prepare whole-cell extract (WCE) DNA. The remaining lysate was used for immunoprecipitation, Anti-FLAG antibody (M2; Sigma-Aldrich) or Anti-HA antibody (HA.11; Covance) were pre-incubated with 30  $\mu$ l magnetic beads (Dynabeads Protein A for anti-HA antibody and Protein G for anti-FLAG antibody), which were then added to cell lysates and

incubated at 4°C overnight. After incubation, the magnetic beads were washed twice with 1 ml of lysis buffer, twice with 1 ml of lysis buffer with 360 mM NaOH, twice with 1 ml of wash buffer (10 mM TrisCl pH8.0, 250 mM LiCl, 0.5% NP-40, 0.5% sodium deoxycholate, 1 mM EDTA) and finally once with 1 ml TE. Then, 40 µl of elution buffer (1% SDS in TE) was added, followed by incubation at 65°C for 15 min. To reverse the crosslinks, the immunoprecipitated DNA and input DNA in the WCE were incubated at 65°C overnight, and then treated with 10 µg of RNase A (Sigma–Aldrich) and 100 µg of Proteinase K (Roche) at 37°C for 2 h. DNA was recovered using a MinElute PCR purification kit (QIAGEN). For ChIP-seq, immunoprecipitated DNA and input DNA in WCE were sequenced using Illumina GAIIx, as previously described [S32]. Sequence tags (36 bases) were mapped on the annotated *N. castellii* genome (CBS 4309) [S3] using ELAND software (Illumina), and counted using BEDTools [S33] at 100 bp no-overlapping windows. The ChIP/input ratio was obtained at each window and plotted using R software (ver 3.0.1) [S34]. ChIP-seq data are absent at some chromosome regions where DNA sequence is repetitive. For quantitative PCR (qPCR), immunoprecipitated DNA and input DNA in WCE were analyzed by Rotor-Gene 6000 (QIAGEN) and SYBR Green PCR kit (QIAGEN).

### Live cell imaging

In all microscopy experiments, live yeast cells were observed without fixation. The procedures for time-lapse fluorescence microscopy were described previously [S35]. Cells were grown in YPD medium and suspended in synthetic medium containing 2% glucose for imaging. Time-lapse images were collected at 25°C. For image acquisition, we used a DeltaVision Elite microscope (Applied Precision), UPlanSApo 100x objective lens (Olympus; NA 1.40), CoolSnap HQ2 CCD camera (Photometrix), and SoftWoRx software (Applied Precision). Images were analyzed with Volocity software (PerkinElmer).

### Computer program and statistical analyses

Multiple sequences of amino acid residues were aligned using JalView (Ver 2.8) [S36] and MafftWS (version 6.8.57) [S37]. The Ndc10 full-length alignment was filtered with Gblocks [S38] to remove unreliably aligned regions. Statistical analyses were carried out using R software (ver 3.0.1) [S34] by choosing the unpaired *t*-test (Figures 2C, D, F; 4B; S3B left) or Fisher's exact test (Figures 2E, S3B right). Gene order along chromosomes was analyzed using YGOB (Yeast Gene Order Browser) [S1]. Centromere motifs in *N. castellii* and *N. dairenensis* were identified using MEME (<http://meme.nbcr.net/meme/>) [S39]. *N. dairenensis* LTR elements and Ty fragments were identified manually and masked before MEME analysis. To create logos of nucleotides (Figures 1B, 4D and S4B), we used the Weblogo3 program (<http://weblogo.threeplusone.com/>) [S40]. Box plots (Figures 2C, D, F; 4B; S3B left) were made by the 'boxplot' in R software. Box indicates the value from the 1st to 3rd quartile (interquartile range: IQR) and a thick line in the box shows a median. The upper whisker and lower whisker show the maximum and minimum values, respectively, which do not exceed 3/2 IQR beyond the box. Outliers, which exceed the range between whiskers, are shown individually in open circles. To estimate the significance of the association between *NcCENs* and the neighbourhoods of ancestral centromeres (Figure S4C), we carried out 10 million replicate simulations in which a random intergenic region was chosen from each *N. castellii* chromosome, and the number of these that were <10 genes away from an *N. castellii* gene whose ortholog in the ancestral genome is <10 genes from an ancestral centromere was counted. The number of associations seen in the real genome (9) was not matched or exceeded in any of the replicates. The median number of associations in the simulations was 1.

### **Colony formation assay and copy number analysis**

The plasmids, used in colony formation assays, were constructed by cloning DNA fragments into the *pRS306* plasmid [S41] and are listed in [Table S4](#). The plasmids (2 µg) were incubated with T11421 (*hoΔ ura3-1*) cells for transformation; T11420 (*dcr1Δ, ura3-1*) and T11459 (*ago1Δ, ura3-1*) cells were also used in [Figure S2E](#). Transformed cells were plated on uracil dropout with 2% glucose. After two days, colonies were counted. For copy number analysis, a single colony was picked and re-plated on uracil dropout plate. One day later, cells were inoculated into 25 ml of uracil dropout media and cultured overnight. To isolate genomic and plasmid DNA from cells,  $2 \times 10^8$  cells were processed with Dr GenTLE High Recovery kit (TaKaRa) following the manufacturer's instructions. Genomic and plasmid DNA was digested with *NotI*, separated on a 1% agarose gel and blotted onto nylon membrane (GE Healthcare). The probes for Southern blots were labeled with Biotin-11-dUTP using North2South Biotin Random Prime Labeling Kit (Thermo Scientific). The hybridization and detection were carried out using North2South Chemiluminescent Detection system (Thermo Scientific) following the manufacturer's protocol. Chemiluminescent signal was detected using Bio-Rad ChemDoc, and images were analyzed quantitatively using Image Lab Software (Bio-Rad).

### **Pulsed field gel electrophoresis (PFGE)**

After overnight culture, cells in 3 ml YPD (OD600  $\approx$  1.0) were collected and washed with 1 ml sterile water and then with 1 ml of 0.5 M EDTA. Subsequently cells were suspended in 20 µl of Zymolyase solution (2 mg/ml Zymolyase 100T, 0.5 mM sorbitol, 100 mM NaPO<sub>4</sub>, 10 mM EDTA) and incubated for 10 min at 37°C. Low melting point agarose (80 µl of 2%) was added and the mixture was pipetted into disposable CHEF plug molds (Bio-Rad) and solidified at 4°C. Plugs were then rinsed twice with 0.5 mM EDTA, and incubated with 1 ml of Proteinase K solution (0.5 M EDTA, 1% w/v sarkosyl, 2 mg/ml Proteinase K [Roche]) at 50°C overnight. Subsequently, plugs were washed twice with 50 mM EDTA, twice with 0.5 x TBE (50 mM Tris-Cl, 50 mM boric acid, 1 mM EDTA) and stored at 4°C. Chromosomes were separated by PFGE using the CHEF-DR II System (Bio-Rad), with switch time of 6.8–158 sec and 6 V/cm voltage, for 24 hours at 16°C. PFGE markers were run as reference. The gels were stained with SYBR<sup>®</sup> Safe (Invitrogen) and scanned with a Fujifilm FLA-5100 Image Scanner. Southern blots were as described in the previous section. Probes for the Southern blots were prepared by amplifying relevant DNA sequences using PCR, with the genome DNA as a template.

## Supplemental References

- S1. Byrne, K.P., and Wolfe, K.H. (2005). The Yeast Gene Order Browser: combining curated homology and syntenic context reveals gene fate in polyploid species. *Genome Res.* 15, 1456-1461.
- S2. Gordon, J.L., Byrne, K.P., and Wolfe, K.H. (2009). Additions, losses, and rearrangements on the evolutionary route from a reconstructed ancestor to the modern *Saccharomyces cerevisiae* genome. *PLoS Genet.* 5, e1000485.
- S3. Gordon, J.L., Armisen, D., Proux-Wera, E., OhEigeartaigh, S.S., Byrne, K.P., and Wolfe, K.H. (2011). Evolutionary erosion of yeast sex chromosomes by mating-type switching accidents. *Proceedings of the National Academy of Sciences of the United States of America* 108, 20024-20029.
- S4. Marie-Nelly, H., Marbouty, M., Cournac, A., Liti, G., Fischer, G., Zimmer, C., and Koszul, R. (2014). Filling annotation gaps in yeast genomes using genome-wide contact maps. *Bioinformatics.* 30, 2105-2113.
- S5. Nieduszynski, C.A., Knox, Y., and Donaldson, A.D. (2006). Genome-wide identification of replication origins in yeast by comparative genomics. *Genes & development* 20, 1874-1879.
- S6. Liachko, I., Bhaskar, A., Lee, C., Chung, S.C., Tye, B.K., and Keich, U. (2010). A comprehensive genome-wide map of autonomously replicating sequences in a naive genome. *PLoS genetics* 6, e1000946.
- S7. Liachko, I., Tanaka, E., Cox, K., Chung, S.C., Yang, L., Seher, A., Hallas, L., Cha, E., Kang, G., Pace, H., et al. (2011). Novel features of ARS selection in budding yeast *Lachancea kluyveri*. *BMC Genomics* 12, 633.
- S8. Di Rienzi, S.C., Lindstrom, K.C., Mann, T., Noble, W.S., Raghuraman, M.K., and Brewer, B.J. (2012). Maintaining replication origins in the face of genomic change. *Genome research* 22, 1940-1952.
- S9. Müller, C.A., and Nieduszynski, C.A. (2012). Conservation of replication timing reveals global and local regulation of replication origin activity. *Genome research* 22, 1953-1962.
- S10. Omberg, L., Meyerson, J.R., Kobayashi, K., Drury, L.S., Diffley, J.F., and Alter, O. (2009). Global effects of DNA replication and DNA replication origin activity on eukaryotic gene expression. *Mol Syst Biol* 5, 312.
- S11. Lejeune, E., and Allshire, R.C. (2011). Common ground: small RNA programming and chromatin modifications. *Curr Opin Cell Biol.* 23, 258-265. doi: 210.1016/j.ceb.2011.1003.1005. Epub 2011 Apr 1017.
- S12. Drinnenberg, I.A., Weinberg, D.E., Xie, K.T., Mower, J.P., Wolfe, K.H., Fink, G.R., and Bartel, D.P. (2009). RNAi in budding yeast. *Science.* 326, 544-550.
- S13. Jager, D., and Philippsen, P. (1989). Stabilization of dicentric chromosomes in *Saccharomyces cerevisiae* by telomere addition to broken ends or by centromere deletion. *The EMBO journal* 8, 247-254.
- S14. Meluh, P.B., Yang, P., Glowczewski, L., Koshland, D., and Smith, M.M. (1998). Cse4p is a component of the core centromere of *Saccharomyces cerevisiae*. *Cell* 94, 607-613.
- S15. Padeganeh, A., De Rop, V., and Maddox, P.S. (2013). Nucleosomal composition at the centromere: a numbers game. *Chromosome Res.* 21, 27-36. doi: 10.1007/s10577-10012-19335-10577. Epub 12013\ Jan 10518.}
- S16. Baker, R.E., and Rogers, K. (2006). Phylogenetic analysis of fungal centromere H3 proteins. *Genetics.* 174, 1481-1492. Epub 2006 Oct 1488.
- S17. Cho, U.S., and Harrison, S.C. (2012). Ndc10 is a platform for inner kinetochore assembly in budding yeast. *Nat Struct Mol Biol* 19, 48-55.
- S18. Hyman, A.A., and Sorger, P.K. (1995). Structure and function of kinetochores in budding yeast. *Annual review of cell and developmental biology* 11, 471-495.



- S19. Meraldi, P., McAinsh, A.D., Rheinbay, E., and Sorger, P.K. (2006). Phylogenetic and structural analysis of centromeric DNA and kinetochore proteins. *Genome biology* 7, R23.
- S20. Perriches, T., and Singleton, M.R. (2012). Structure of yeast kinetochore Ndc10 DNA-binding domain reveals unexpected evolutionary relationship to tyrosine recombinases. *J Biol Chem.* 287, 5173-5179.
- S21. Brock, J.A., and Bloom, K. (1994). A chromosome breakage assay to monitor mitotic forces in budding yeast. *J Cell Sci.* 107, 891-902.
- S22. Koshland, D., Rutledge, L., Fitzgerald-Hayes, M., and Hartwell, L.H. (1987). A genetic analysis of dicentric minichromosomes in *Saccharomyces cerevisiae*. *Cell.* 48, 801-812.
- S23. Clarke, L., and Carbon, J. (1985). The structure and function of yeast centromeres. *Annu Rev Genet.* 19, 29-55.
- S24. Gordon, J.L., Byrne, K.P., and Wolfe, K.H. (2011). Mechanisms of chromosome number evolution in yeast. *PLoS Genet.* 7, e1002190.
- S25. Petersen, R.F., Langkjaer, R.B., Hvidtfeldt, J., Gartner, J., Palmen, W., Ussery, D.W., and Piskur, J. (2002). Inheritance and organisation of the mitochondrial genome differ between two *Saccharomyces* yeasts. *J Mol Biol* 318, 627-636.
- S26. Janke, C., Magiera, M.M., Rathfelder, N., Taxis, C., Reber, S., Maekawa, H., Moreno-Borchart, A., Doenges, G., Schwob, E., Schiebel, E., et al. (2004). A versatile toolbox for PCR-based tagging of yeast genes: new fluorescent proteins, more markers and promoter substitution cassettes. *Yeast* 21, 947-962.
- S27. Snaith, H.A., Samejima, I., and Sawin, K.E. (2005). Multistep and multimode cortical anchoring of tea1p at cell tips in fission yeast. *The EMBO journal* 24, 3690-3699.
- S28. Wisniewski, J., Hajj, B., Chen, J., Mizuguchi, G., Xiao, H., Wei, D., Dahan, M., and Wu, C. (2014). Imaging the fate of histone Cse4 reveals de novo replacement in S phase and subsequent stable residence at centromeres. *Elife.* 3:e02203., 10.7554/eLife.02203.
- S29. Astromskas, E., and Cohn, M. (2009). Ends-in vs. ends-out targeted insertion mutagenesis in *Saccharomyces castellii*. *Curr Genet* 55, 339-347.
- S30. Astromskas, E., and Cohn, M. (2007). Tools and methods for genetic analysis of *Saccharomyces castellii*. *Yeast.* 24, 499-509.
- S31. Tanaka, T., Knapp, D., and Nasmyth, K. (1997). Loading of an Mcm protein onto DNA replication origins is regulated by Cdc6p and CDKs. *Cell* 90, 649-660.
- S32. Yamashita, R., Sathira, N.P., Kanai, A., Tanimoto, K., Arauchi, T., Tanaka, Y., Hashimoto, S., Sugano, S., Nakai, K., and Suzuki, Y. (2011). Genome-wide characterization of transcriptional start sites in humans by integrative transcriptome analysis. *Genome research* 21, 775-789.
- S33. Quinlan, A.R., and Hall, I.M. (2010). BEDTools: a flexible suite of utilities for comparing genomic features. *Bioinformatics.* 26, 841-842. doi: 810.1093/bioinformatics/btq1033. Epub 2010 Jan 1028.
- S34. Team, R.C. (2013). R: A language and environment for statistical computing, (Vienna, Austria: R Foundation for Statistical Computing).
- S35. Tanaka, K., Kitamura, E., and Tanaka, T.U. (2010). Live-cell analysis of kinetochore-microtubule interaction in budding yeast. *Methods* 51, 206-213.
- S36. Waterhouse, A.M., Procter, J.B., Martin, D.M., Clamp, M., and Barton, G.J. (2009). Jalview Version 2--a multiple sequence alignment editor and analysis workbench. *Bioinformatics* 25, 1189-1191.
- S37. Katoh, K., and Toh, H. (2010). Parallelization of the MAFFT multiple sequence alignment program. *Bioinformatics* 26, 1899-1900.

- S38. Talavera, G., and Castresana, J. (2007). Improvement of phylogenies after removing divergent and ambiguously aligned blocks from protein sequence alignments. *Syst Biol.* 56, 564-577.
- S39. Bailey, T.L., and Elkan, C. (1994). Fitting a mixture model by expectation maximization to discover motifs in biopolymers. *Proceedings / ... International Conference on Intelligent Systems for Molecular Biology ; ISMB. International Conference on Intelligent Systems for Molecular Biology 2*, 28-36.
- S40. Crooks, G.E., Hon, G., Chandonia, J.M., and Brenner, S.E. (2004). WebLogo: a sequence logo generator. *Genome research* 14, 1188-1190.
- S41. Sikorski, R.S., and Hieter, P. (1989). A system of shuttle vectors and yeast host strains designed for efficient manipulation of DNA in *Saccharomyces cerevisiae*. *Genetics.* 122, 19-27.
